1 **A cryptic transcription factor regulates *Caulobacter* adhesin development**

2 Maeve McLaughlin<sup>1</sup>, David M. Hershey<sup>2</sup>, Leila Reyes Ruiz<sup>3</sup>, Aretha Fiebig<sup>1</sup>, Sean Crosson<sup>1</sup>

3 <sup>1</sup>Department of Microbiology and Molecular Genetics, Michigan State University, East Lansing,

4 MI, USA

5 <sup>2</sup>Department of Bacteriology, University of Wisconsin, Madison, WI, USA.

6 <sup>3</sup>Department of Microbiology and Immunology, University of North Carolina, Chapel Hill, NC,

7 USA.

## 8 **Abstract**

9 *Alphaproteobacteria* commonly produce an adhesin that is anchored to the exterior of the  
10 envelope at one cell pole. In *Caulobacter crescentus*, this adhesin enables permanent attachment  
11 to solid surfaces and is known as the holdfast. An ensemble of two-component signal transduction  
12 (TCS) proteins control *C. crescentus* holdfast biogenesis by indirectly regulating expression of  
13 HfiA, a potent inhibitor of holdfast synthesis. A genetic selection to discover direct *hfiA* regulators  
14 that function downstream of this adhesion TCS system identified a hypothetical gene that we have  
15 named *rtrC*. Though the primary structure of RtrC bears no resemblance to any defined protein  
16 family, RtrC directly binds and regulates dozens of sites on the *C. crescentus* chromosome via a  
17 pseudo-palindromic motif. Among these binding sites is the *hfiA* promoter, where RtrC functions  
18 to directly repress transcription and thereby activate holdfast development. RtrC, the DNA-binding  
19 response regulator SpdR, and the transcription factor RtrB together form an OR-gated type I  
20 coherent feedforward loop (C1-FFL) that regulates *hfiA* transcription. C1-FFL motifs are known to  
21 buffer gene expression against transient loss of regulating signals, which often occurs in  
22 fluctuating natural environments. We conclude that the formerly hypothetical gene, *rtrC*, encodes  
23 a transcription factor that functions downstream of the *C. crescentus* TCS adhesion control  
24 system to regulate development of the holdfast adhesin.

25

## 26 Introduction

27 The ability of microbial cells to adhere to surfaces and form biofilms is often a key  
28 determinant of fitness in both clinical and non-clinical contexts [1-3]. Colonization of substrates  
29 can support energy production [4], protect cells from toxic compounds [5, 6], and shield cells from  
30 grazing protist predators [7]. However, competition for resources in a multicellular biofilm can also  
31 slow growth; thus, there are evolutionary tradeoffs between surface attached and planktonic  
32 lifestyles [8]. Given that the fitness benefit of surface attachment varies as a function of  
33 environmental conditions, it follows that the cellular decision to adhere to a substrate is highly  
34 regulated.

35 Gram-negative bacteria of the genus *Caulobacter* are common in aquatic and soil  
36 ecosystems [9] and are dominant members of mixed biofilm communities in freshwater [10].  
37 *Caulobacter* spp. often produce a secreted polar adhesin known as the holdfast, which enables  
38 high-affinity attachment to surfaces [11] and robust biofilm formation [12]. In the model  
39 *Caulobacter* species, *C. crescentus*, holdfast development is regulated at many levels. The  
40 transcription of holdfast synthesis genes exhibits periodic changes across the cell cycle [13, 14].  
41 Holdfast biogenesis is also influenced by mechanical cues [15, 16], while the second messenger  
42 cyclic-di-GMP affects both synthesis [16] and physical properties of [17] the holdfast. Additionally,  
43 an elaborate regulatory pathway comprised of multiple two-component signaling (TCS) proteins  
44 and one-component regulators controls holdfast development and surface attachment [18]. We  
45 have previously shown that a *C. crescentus* strain expressing a non-phosphorylatable allele of  
46 the *lovK* sensor histidine kinase (*lovK<sub>H180A</sub>*) overproduces holdfast and, consequently, has an  
47 enhanced adhesion phenotype in a static biofilm assay. The *lovK<sub>H180A</sub>* adhesion phenotype  
48 requires the *spdS-spdR* two-component system and the hybrid histidine kinase *skaH* [18]. Two  
49 XRE-family transcription factors, RtrA and RtrB, function downstream of the TCS regulators to  
50 promote holdfast synthesis by directly repressing transcription of the holdfast inhibitor, *hfiA*  
51 (Figure 1A). Though *rtrA* and *rtrB* clearly contribute to holdfast regulation downstream of the

52 adhesion TCS proteins, we hypothesized that there were additional regulators of *C. crescentus*  
53 holdfast biosynthesis in this pathway. Our hypothesis is based on the observation that deletion of  
54 both *rtrA* and *rtrB* does not completely abrogate holdfast synthesis when the TCS pathway is  
55 constitutively activated [18] (Figure 2A).

56 To search for these postulated downstream regulators, we used a high-throughput genetic  
57 approach to select for mutations that attenuate the hyper-holdfast phenotype of a *lovK*<sub>H180A</sub>  
58 mutant. Our selection uncovered a gene encoding a hypothetical protein that we have named  
59 RtrC, which functions as both a transcriptional activator and repressor in *C. crescentus*. RtrC  
60 binds a pseudo-palindromic DNA motif *in vivo* and *in vitro* and activates holdfast synthesis  
61 downstream of the *lovK-spdSR-skaH* TCS ensemble by directly repressing transcription of the  
62 holdfast inhibitor, *hfiA*. RtrC can also directly control the transcription of dozens of other genes in  
63 *C. crescentus* via this pseudo-palindromic site, including genes that impact flagellar motility,  
64 cyclic-di-GMP signaling, and aerobic respiration.

65

## 66 **Results**

67 *A hypothetical protein functions downstream of the TCS regulators, LovK and SpdR, to activate*  
68 *holdfast synthesis*

69 An ensemble of two-component signal transduction (TCS) proteins in *C. crescentus*,  
70 including LovK and SpdR, can control holdfast synthesis by regulating transcription of *hfiA*. A  
71 previous study identified two XRE-family transcription factors, RtrA and RtrB, that function  
72 downstream of this TCS system to repress *hfiA* and thereby activate holdfast synthesis [18]  
73 (Figure 1A). However, deleting *rtrA*, *rtrB*, or both [18] has only modest effects on holdfast  
74 synthesis when the TCS system is constitutively activated (Figure 2B). We therefore reasoned  
75 that there are additional downstream regulators in this pathway that can activate *C. crescentus*  
76 holdfast synthesis. To identify such genes, we constructed a randomly barcoded transposon  
77 mutant library in a *lovK* mutant background (*lovK*<sub>H180A</sub>) in which holdfast synthesis is constitutively

78 activated. This barcoded library was cultivated and serially passaged in the presence of  
79 cheesecloth, a process that titrates adhesive cells from liquid medium as recently described [19].  
80 Non-adhesive mutants become enriched in the media supernatant surrounding the cheesecloth,  
81 which is reflected as a positive fitness score when the total barcoded population is quantified  
82 (Figure 1B). Using this approach, we aimed to identify transposon insertions that ablated the  
83 hyper-holdfast phenotype of a mutant in which the adhesion pathway is constitutively active.

84 We expected that performing this genetic selection in a hyper-holdfast *lovK*<sub>H180A</sub>  
85 background would not only uncover previously identified loss-of-adhesion mutants [19] but would  
86 also identify new regulators that function to activate holdfast synthesis downstream of LovK. As  
87 expected, strains harboring transposon insertions in all the known adhesion TCS genes (e.g. *lovK*,  
88 *spdS*, *spdR* and *skaH*) had increased abundance in the supernatant (i.e. decreased adhesion to  
89 cheesecloth, and positive fitness scores) when grown in the presence of cheesecloth. Insertions  
90 in select polar development regulators, and in holdfast synthesis and anchoring genes also  
91 resulted in the expected positive fitness scores (Figures 1C and Table S1). Strains with insertions  
92 in gene locus *CCNA\_00551*, which encodes a predicted 146-residue hypothetical protein, had  
93 strongly positive fitness scores after cheesecloth selection. In fact, strains with insertions in  
94 *CCNA\_00551* were enriched in the supernatant to a greater extent than TCS adhesion mutants  
95 or *rtrA* and *rtrB* mutants (Figure 1C and Table S1). Consistent with these Tn-seq data, in-frame  
96 deletion of either *spdR* or *CCNA\_00551* from the chromosome abrogated the hyper-holdfast  
97 phenotype of *lovK*<sub>H180A</sub> (Figure 2A). Expression of *CCNA\_00551* is directly activated by the DNA-  
98 binding response regulator, SpdR [18, 20], which implicated *CCNA\_00551* in the adhesion TCS  
99 pathway. Following the convention of previously named adhesion factors that function  
100 downstream of SpdR [18], we henceforth refer to *CCNA\_00551* as *rtrC*.

101 SpdR functions downstream of LovK [18] (Figure 1A) and expression of a phosphomimetic  
102 allele of SpdR (SpdR<sub>D64E</sub>) provides an alternative genetic approach to constitutively activate the  
103 *C. crescentus* adhesion TCS system. We predicted that deletion of *rtrC* would also abrogate the

104 hyperadhesive phenotype of a *spdR*<sub>D64E</sub> strain. Consistent with this prediction and with the Tn-  
105 seq data, we observed that the fraction of cells with visibly stained holdfasts was reduced in a  
106 *spdR*<sub>D64E</sub>  $\Delta$ *rtrC* strain compared to the *spdR*<sub>D64E</sub> parent (Figure 2B). There was no significant  
107 difference in the percentage of cells with visibly stained holdfasts between *spdR*<sub>D64E</sub>  $\Delta$ *rtrA*  $\Delta$ *rtrB*  
108  $\Delta$ *rtrC* and *spdR*<sub>D64E</sub>  $\Delta$ *rtrC* (Figure 2B). This provides evidence that RtrC is the primary downstream  
109 determinant of hyperadhesion when the TCS adhesion pathway is constitutively active. Indeed,  
110 overexpression of *rtrC* alone enhanced the fraction of cells with stained holdfasts more than  
111 overexpression of either *rtrA* or *rtrB* (Figure 2C).

112

113 *RtrC is a predicted transcription factor*

114 A search of protein domain family databases in InterPro [21] and the Conserved Domain  
115 Database [22] failed to identify conserved domains in RtrC. However, a primary and secondary  
116 structure profile matching approach [23] indicated that RtrC resembled classic transcription  
117 factors. To explore this possibility, we implemented AlphaFold [24] to predict the tertiary structure  
118 of RtrC. This approach predicted a fold that contained five  $\alpha$ -helices ( $\alpha$ 1 –  $\alpha$ 5) and two  $\beta$ -strands  
119 ( $\beta$ 1 –  $\beta$ 2) that form an antiparallel  $\beta$  hairpin (Figure 3A). We compared this structure to the Protein  
120 Data Bank (PDB) using Dali [25], which revealed that the predicted structure of RtrC was most  
121 similar to MepR (PDB: 3ECO), a MarR-family transcriptional regulator from *Staphylococcus*  
122 *aureus* containing a winged helix-turn-helix motif [26]. Based on the structural alignments and 3D  
123 superposition with MepR,  $\alpha$ 1 and  $\alpha$ 5 of RtrC likely form a dimerization domain, while  $\alpha$ 2,  $\alpha$ 3,  $\alpha$ 4,  
124  $\beta$ 1, and  $\beta$ 2 form a winged helix-turn-helix (Figure 3A and 3B). Considering these structural  
125 predictions, we hypothesized that *rtrC* encoded a transcription factor that functions downstream  
126 of the *C. crescentus* TCS adhesion regulatory system.

127

128 *RtrC is a potent repressor of the holdfast inhibitor, hfiA*

129           The transcription factors RtrA and RtrB are known to activate holdfast synthesis and  
130 adhesion by repressing transcription of the holdfast inhibitor, *hfiA* [18]. Given the correlated  
131 phenotypes of *rtrA*, *rtrB*, and *rtrC* mutants and the prediction that RtrC is a transcription factor  
132 (Figures 2 & 3), we hypothesized that RtrC functioned as a transcriptional repressor of *hfiA*. To  
133 test this model, we measured changes in expression from a fluorescent *hfiA* transcriptional  
134 reporter upon overexpression of *rtrC*. As expected, overexpression of *rtrA* and *rtrB* reduced signal  
135 from the P<sub>*hfiA*</sub> fluorescent reporter by 80% and 30%, respectively. Overexpression of *rtrC* resulted  
136 in a 95% reduction in *hfiA* expression (Figure 2D).

137

138 *RtrC binds to a pseudo-palindromic DNA motif in vivo and in vitro*

139           We next sought to directly test the predicted DNA-binding function of RtrC. We performed  
140 chromatin immunoprecipitation sequencing (ChIP-seq) using a 3xFLAG-tagged *rtrC* allele and  
141 identified 113 statistically significant peaks across the genome (Table S3). Peaks were highly  
142 enriched near experimentally defined transcription start sites (TSS) [27, 28] when compared to a  
143 set of randomly generated peaks (Figure 4B); this TSS-proximal enrichment pattern is  
144 characteristic of proteins that directly bind DNA to regulate gene expression. To identify putative  
145 binding motifs in the ChIP-seq peaks, we analyzed the peak sequences using the XSTREME  
146 algorithm within the MEME Suite [29]. This revealed a pseudo-palindromic motif in 112 of the 113  
147 *rtrC* peaks (E-value:  $2.3e^{-12}$ ) that likely corresponded to an RtrC binding site (Figure 4C).

148           To test if RtrC bound to this predicted binding site, we performed electrophoretic mobility  
149 shift assays (EMSA) with purified RtrC. Increasing concentrations of RtrC shifted a labeled DNA  
150 probe, containing a 27 bp sequence from the *hfiA* promoter centered on the predicted RtrC binding  
151 motif (Figure 4A and 4D). RtrC bound to this pseudo-palindrome in the *hfiA* promoter with high  
152 affinity ( $k_d$  of  $45 \pm 9$  nM) (Figure S1). Addition of excess unlabeled specific DNA probe competed  
153 with labeled probe bound to RtrC, while unlabeled non-specific probe did not compete for RtrC

154 binding (Figure 4D). These data provide evidence that RtrC directly represses *hfiA* transcription  
155 by specifically binding to a pseudo-palindromic motif in the *hfiA* promoter.

156

157 *RtrC is a transcriptional activator and repressor*

158 To further characterize the function of RtrC as a transcriptional regulator, we used RNA  
159 sequencing (RNA-seq) to measure changes in transcript levels upon *rtrC* overexpression (*rtrC*<sup>++</sup>).  
160 By combining RNA-seq and ChIP-seq datasets, we identified genes that are directly controlled by  
161 RtrC. Direct targets were defined as genes that *a*) were differentially regulated in *rtrC*<sup>++</sup> relative to  
162 an empty vector control, *b*) contained an RtrC-enriched peak by ChIP-seq, and *c*) contained an  
163 RtrC binding motif in their promoter region [30]. Of the directly regulated genes, 63% were  
164 activated and 37% were repressed by RtrC (Table S2). Consistent with transcriptional reporter  
165 analysis (Figure 2D), *hfiA* transcript levels were ~5-fold lower in *rtrC*<sup>++</sup> compared to the vector  
166 control (Table S2). To confirm the RNA-seq results, we constructed several fluorescent  
167 transcriptional reporters for genes identified as direct targets of RtrC. Consistent with the RNA-  
168 seq data, *rtrC* overexpression significantly increased reporter signal for *CCNA\_00629* (2.6-fold)  
169 and *CCNA\_00538* (2.0-fold) and decreased reporter signal for *CCNA\_00388* (6.7-fold) compared  
170 to an empty vector control (Figure 5B). RtrC bound to the *rtrC* promoter *in vivo* as demonstrated  
171 by ChIP-seq, and signal from a *rtrC* transcriptional reporter was 19-fold lower when *rtrC* was  
172 overexpressed (Figure 5B). From this, we conclude that RtrC is a negative autoregulator.

173 We also measured signal from transcriptional reporters for several genes that contained  
174 RtrC motifs in their promoters but did not meet the statistical threshold for differential regulation  
175 by *rtrC* overexpression in the RNA-seq dataset. There was no significant change in transcription  
176 from 11 of these 16 reporters in response to *rtrC* overexpression, which was consistent with RNA-  
177 seq measurements (Figure S2). *rtrC* overexpression significantly enhanced transcription from the  
178 remaining 5 reporters: *CCNA\_03585* (2.0-fold), *CCNA\_02901* (1.6-fold), *dgrB* (5.8-fold),  
179 *CCNA\_01140* (1.6-fold), and *CCNA\_02976* (1.4-fold) (Figure 5B). Together, these ChIP-seq,



180 RNA-seq and reporter data provide evidence that RtrC can function as both a direct transcriptional  
181 activator and repressor.

182

183 *RtrC motif position within regulated promoters correlates with transcriptional activity*

184 We hypothesized that the activity of RtrC as an activator or repressor depends on its  
185 binding position within a promoter relative to the transcription start site (TSS). To assess whether  
186 position correlated with regulatory activity, we analyzed the location of RtrC binding motifs within  
187 the promoters of genes that were up- or downregulated based on RNA-seq and transcriptional  
188 reporter data. Promoters directly repressed by RtrC typically had predicted motifs that overlapped  
189 the -10/-35 region of the promoter. In contrast, genes activated by RtrC had binding motifs that  
190 were located upstream of the -10/-35 region (Figure 5C). These data provide evidence that the  
191 regulatory activity of RtrC is related to the position of the RtrC binding site in a promoter. The  
192 results of this analysis are consistent with a well-described trend in which DNA-binding regulators  
193 that function as repressors bind at or near the transcription start site, while activators typically  
194 bind upstream of the -10/-35 region to promote transcription [31].

195

196 *SpdR, RtrB, and RtrC form a Type I coherent feedforward loop*

197 Transcript levels of *rtrB* were 12-fold higher in the *rtrC*<sup>++</sup> background relative to a vector  
198 control, placing it among the most highly activated direct targets of RtrC (Table S2). This result,  
199 along with previous findings that SpdR activates transcription of both *rtrB* and *rtrC* [18, 20],  
200 suggested that these three proteins could form a coherent type I feedforward loop (FFL) (Figure  
201 6A). The regulatory role of this predicted coherent type I FFL depends on whether *C. crescentus*  
202 uses AND-gated logic, in which both SpdR and RtrC are required to activate *rtrB* expression, or  
203 OR-gated logic, in which either SpdR or RtrC can activate *rtrB* expression [32]. To test FFL gating,  
204 we deleted *spdR* and *rtrC* from the chromosome and measured fluorescence from a *rtrB*  
205 transcriptional reporter upon expression of *spdR*<sub>D64E</sub> and/or *rtrC* from inducible promoters.

206 Expression of either *rtrC* or *spdR*<sub>D64E</sub> alone increased transcription from the *rtrB* reporter by ~5-  
207 fold, while expression of both *rtrC* and *spdR*<sub>D64E</sub> increased transcription by ~6-fold (Figure 6B).  
208 *spdR* deletion significantly reduced transcription from a P<sub>*rtrB*</sub> reporter in stationary phase (Figure  
209 S3). As expected, deletion of *rtrC* alone did not affect transcription from P<sub>*rtrB*</sub> as *spdR* is still present  
210 on the chromosome (Figure S3). We conclude that either SpdR or RtrC can activate *rtrB*  
211 expression and are therefore competent to form an OR-gated coherent type I FFL in *C.*  
212 *crescentus*.

213

214 *RtrC* deletion does not affect holdfast biogenesis in stationary phase

215 SpdR affects gene regulation during stationary phase [20, 33], and was previously  
216 reported to bind *rtrC* promoter DNA [20]. These published results led us to assess the effect of  
217 *rtrC* gene deletion on holdfast synthesis in log and stationary phase in complex medium. The  
218 fraction of cells with holdfasts in complex medium during early log phase was not significantly  
219 different in strains with in-frame deletions of *spdR*, *rtrA*, *rtrB*, *rtrC*, or in a strain missing all three  
220 *rtr* regulators (Figure S4). Stained holdfasts are greatly reduced in stationary phase, though this  
221 effect does not require *spdR*. Diminished holdfast counts in stationary phase are more  
222 pronounced in strains lacking *rtrB* but are unaffected by deletion of *rtrC* (Figure S4). A  
223 constellation of changes in cell physiology in stationary phase, including a slowed cell cycle, LovK-  
224 SpdSR-SkaH signaling and changes in levels of nucleotide signals such as (p)ppGpp and cyclic-  
225 di-GMP, likely contribute to reduction in holdfast in stationary phase in complex medium. The  
226 spectrum of environmental conditions that may affect holdfast development via *rtrC* remain  
227 undefined, though published transcriptomic data provide evidence that carbon limitation [34], cell  
228 cycle [35], and stringent response signaling [36] also significantly affect *rtrC* transcription.

229

230 *RtrC* overexpression reduces cell motility in soft agar

231 RtrC directly regulates several genes with predicted roles in motility (Figure 5 and Table  
232 S2). We therefore tested whether RtrC expression can affect cell motility by measuring cell  
233 spreading through soft agar. We observed a consistent reduction in swarm diameter in the strain  
234 overexpressing *rtrC* compared to the empty vector control, though the effect is small (Figure S5).  
235 The transcription of the cyclic-di-GMP receptor *dgrB* is activated by *rtrC* overexpression, and we  
236 postulated that the effect of *rtrC*<sup>++</sup> on motility may be affected by *dgrB*. However, deletion of *dgrB*  
237 had no effect on the motility phenotype of *rtrC*<sup>++</sup>.

238

## 239 Discussion

240 We designed a forward genetic selection to search for novel holdfast regulators and  
241 identified RtrC. This formerly hypothetical protein functions downstream of an ensemble of TCS  
242 regulatory genes to activate surface adhesion. RtrC binds and regulates multiple sites on the *C.*  
243 *crescentus* chromosome, including the *hfiA* promoter where it represses *hfiA* transcription and  
244 thereby activates holdfast synthesis.

245

### 246 *RtrC structure and regulatory activity*

247 A comparison of the predicted three-dimensional structure of RtrC to experimental  
248 structures available in the PDB suggested structural similarity to MepR and several other MarR  
249 family transcriptional regulators. Members of this transcription factor family often bind as dimers  
250 to pseudo-palindromic DNA sequences [37-39]. MarR family transcriptional regulators are known  
251 to function as both activators and repressors, depending on the position of binding within  
252 regulated promoters. Similarly, we observed that the activity of RtrC as an activator or repressor  
253 was correlated with the position of the RtrC motif within the promoter; this positional effect on  
254 transcriptional regulation is a well-described phenomenon [40]. The sequence of RtrC is not  
255 broadly conserved. It is largely restricted to the Caulobacterales and Rhodospirillales where it is

256 annotated as a hypothetical protein. However, our data provide evidence that RtrC (like MarR) is  
257 a classic transcription factor.

258

259 *A new layer of hfiA regulation*

260 Holdfast-dependent surface attachment in *C. crescentus* is permanent. Accordingly,  
261 holdfast synthesis is highly regulated. The small protein, HfiA, is central to holdfast control. It  
262 represses holdfast biogenesis by directly interacting with the glycosyltransferase HfsJ, an enzyme  
263 required for synthesis of holdfast polysaccharide [41]. *hfiA* expression is influenced by multiple  
264 cell cycle regulators, TCS sensory/signaling systems, a transcriptional regulator of stalk  
265 biogenesis, and c-di-GMP [18, 41-43]. We have shown that RtrC functions downstream of the  
266 stationary phase response regulator, SpdR, to directly bind the *hfiA* promoter and represses its  
267 transcription. SpdR can therefore regulate expression of at least three different direct repressors  
268 of *hfiA* transcription – *rtrA*, *rtrB*, and *rtrC* (Figure 7).

269 Why, then, does the *spdR* response regulator have so many outlets to directly modulate  
270 *hfiA* transcription? We do not know whether the activities of RtrA, RtrB, or RtrC as transcription  
271 factors are allosterically regulated by small molecules, chemical modifications, or protein-protein  
272 interactions. If these transcription factors are subject to allosteric regulation, it may be the case  
273 that this suite of proteins serves to integrate multiple environmental or cellular signals. In such a  
274 model, primary signals that regulate the transcriptional activity of SpdR may enhance expression  
275 of RtrA, RtrB, or RtrC, which could then influence the scale of adhesion to substrates in response  
276 to secondary physical or chemical cues. Another possible explanation for multiple adhesion  
277 transcription factors downstream of SpdR is redundancy. Transcription factor redundancy may  
278 buffer the network against transient changes in signaling and gene regulation, ensuring that the  
279 decision to synthesize a holdfast (or not) is less subject to environmental fluctuations.

280

281 *More on the RtrC regulon*

282           The *cox* genes encode an aa<sub>3</sub>-type cytochrome oxidase. *C. crescentus* encodes at least  
283 four different aerobic terminal oxidase complexes [44], and the data presented herein provide  
284 evidence that the *spdR-rtrC* axis activates transcription of the *cox* aa<sub>3</sub>-type terminal oxidase genes  
285 (Table S2). In *Pseudomonas aeruginosa*, an aa<sub>3</sub>-type oxidase is reported to provide a survival  
286 advantage for cells under starvation conditions [45]. The physiological relevance of *cox* regulation  
287 by RtrC in *C. crescentus* is the subject of ongoing investigation.

288           RtrC directly regulates expression of several genes involved in c-di-GMP signaling  
289 including the c-di-GMP receptor *dgrB*, a PAS-containing EAL phosphodiesterase (*CCNA\_01140*),  
290 and a GGDEF-EAL protein (*CCNA\_00089*). Deletion of *CCNA\_00089* is reported to increase  
291 surface attachment [46]. Given that *rtrC* overexpression represses *CCNA\_00089* expression  
292 (Table S2), it is possible that *rtrC* influences adhesion through *CCNA\_00089* in addition to *hfiA*.  
293 DgrB directly binds c-di-GMP and represses cellular motility [47]. However, deletion of *dgrB* did  
294 not affect *C. crescentus* motility in soft agar in either *rtrC* overexpression or vector control strains  
295 (Figure S5). RtrC also directly activated expression of genes with predicted roles in chemotaxis,  
296 including two methyl-accepting chemotaxis proteins (*CCNA\_00538* and *CCNA\_02901*) and a  
297 *cheY* receiver domain protein (*CCNA\_03585*). Additionally, RtrC activates transcription of an  
298 alternative chemotaxis cluster (*CCNA\_00628* and *CCNA\_00629-CCNA\_00634*), which has been  
299 reported to influence *hfiA* transcription and *C. crescentus* surface adherence [42].

300

### 301 *Feedback control in the adhesion pathway*

302           Our data provide evidence that *spdR* and *rtrC* form a type I coherent feedforward loop  
303 (C1-FFL) with the adhesion factor *rtrB*. Experimental and theoretical studies of C1-FFLs indicate  
304 that they function as sign-sensitive delay elements [32, 48]. AND-gated C1-FFLs exhibit a delay  
305 in the ON step of output expression, which can allow circuits to function as persistence detectors  
306 [32, 49]. Conversely, OR-gated C1-FFLs delay the OFF step of output expression, which can  
307 buffer the circuit against the transient loss of activating signals [32, 48]. Expression of either *spdR*

308 or *rtrC* was sufficient to activate transcription from a  $P_{rtrB}$  reporter, indicating that the *spdR-rtrC-*  
309 *rtrB* C1-FFL is competent to function as an OR-gated system. Though the exact environmental  
310 signals that regulate the adhesion TCS pathway remain undefined, the architecture of the SpdR-  
311 RtrC-RtrB circuit suggests that RtrC can reinforce *rtrB* expression in particular environments  
312 where the levels of activating signals for SpdR are fluctuating or noisy.

313 The DNA-binding response regulator, SpdR, is regulated in a growth phase and media-  
314 dependent fashion [20, 33], and systems homologous to *C. crescentus* SpdS-SpdR are reported  
315 to respond to cellular redox state and to flux through the electron transport chain (ETC) via  
316 modulation of disulfide bond formation [50], modification of a reactive cysteine [51], or by binding  
317 of oxidized quinones [52, 53]. *C. crescentus* SpdS contains both the reactive cysteine and  
318 quinone-interacting residues observed in related bacteria, suggesting that SpdS may be regulated  
319 in a similar manner. The activity of SpdR as a transcriptional regulator is also affected by the  
320 sensor kinases LovK and SkaH [18]. Thus, multiple environmental signals apparently feed into  
321 SpdR-dependent gene regulation.

322 This study expands our understanding of a transcriptional network functioning  
323 downstream of a consortium of TCS proteins – LovK, SkaH, SpdS, and SpdR – that affect surface  
324 adherence in *Caulobacter*. The DNA-binding response regulator SpdR regulates expression of  
325 three transcription factor genes (*rtrA*, *rtrB*, and *rtrC*) that directly repress the holdfast inhibitor,  
326 *hfiA*. Of these three transcription factors, RtrC is the most potent regulator of *hfiA*. However, it is  
327 clear from the ChIP-seq and transcriptomic data presented in this study that the regulatory  
328 function of RtrC likely extends well beyond *hfiA* and holdfast synthesis (Figure 7). Efforts focused  
329 on comparative analysis of the SpdR, RtrA, RtrB, and RtrC regulons will provide a more complete  
330 understanding of the regulatory logic that underpins the highly complex process of holdfast  
331 adhesin development in *Caulobacter*.

332

333 **Materials and Methods**

334 *Strain growth conditions*

335 *Escherichia coli* was grown in Lysogeny broth (LB) or LB agar (1.5% w/v) at 37°C [54]. Medium  
336 was supplemented with the following antibiotics when necessary: kanamycin 50 µg ml<sup>-1</sup>,  
337 chloramphenicol 20 µg ml<sup>-1</sup>, oxytetracycline 12 µg ml<sup>-1</sup>, and carbenicillin 100 µg ml<sup>-1</sup>.

338 *Caulobacter crescentus* was grown in peptone-yeast extract (PYE) broth (0.2% (w/v) peptone,  
339 0.1% (w/v) yeast extract, 1 mM MgSO<sub>4</sub>, 0.5 mM CaCl<sub>2</sub>), PYE agar (1.5% w/v), or M2 defined  
340 medium supplemented with xylose (0.15% w/v) as the carbon source (M2X) [55] at 30°C. Solid  
341 medium was supplemented with the following antibiotics where necessary: kanamycin 25 µg ml<sup>-1</sup>  
342 <sup>1</sup>, chloramphenicol 1 µg ml<sup>-1</sup>, and oxytetracycline 2 µg ml<sup>-1</sup>. Liquid medium was supplemented  
343 with the following antibiotics where necessary: chloramphenicol 1 µg ml<sup>-1</sup>, and oxytetracycline 2  
344 µg ml<sup>-1</sup>.

345

346 *Tn-Himar mutant library construction and mapping*

347 Construction and mapping of the barcoded Tn-himar library was performed following  
348 protocols originally described by Wetmore and colleagues [56]. A 25 ml culture of the *E. coli*  
349 APA\_752 barcoded transposon donor pool (obtained from Adam Deutschbauer Lab) was grown  
350 to mid-log phase in LB broth supplemented with kanamycin and 300 µM diaminopimelic acid  
351 (DAP). A second 25 ml culture of *C. crescentus lovK<sub>H180A</sub>* was grown to mid-log phase in PYE.  
352 Cells from both cultures were harvested by centrifugation, washed twice with PYE containing 300  
353 µM DAP, mixed and spotted together for conjugation on a PYE agar plate containing 300 µM  
354 DAP. After incubating the plate overnight at room temperature, the cells were scraped from the  
355 plate, resuspended in PYE medium, spread onto 20, 150 mm PYE agar plates containing  
356 kanamycin and incubated at 30°C for three days. Colonies from each plate were scraped into  
357 PYE medium and used to inoculate a 25 ml PYE culture containing 5 µg ml<sup>-1</sup> kanamycin. The

358 culture was grown for three doublings, glycerol was added to 20% final concentration, and 1 ml  
359 aliquots were frozen at -80°C.

360 To map the sites of transposon insertion, we again followed the protocols of Wetmore et  
361 al. [56]. Briefly, genomic DNA was purified from three 1 ml aliquots of each library. The DNA was  
362 sheared and ~300 bp fragments were selected before end repair. A Y-adapter (Mod2\_TS\_Univ,  
363 Mod2\_TrueSeq) was ligated and used as a template for transposon junction amplification with the  
364 primers Nspacer\_BarSeq\_pHIMAR and either P7\_mod\_TS\_index1 or P7\_mod\_TS\_index2. 150-  
365 bp single end reads were collected on an Illumina HiSeq 2500 in rapid run mode, and the genomic  
366 insertion positions were mapped and correlated to a unique barcode using BLAT [57] and  
367 MapTnSeq.pl to generate a mapping file with DesignRandomPool.pl. Using this protocol, we  
368 identified 232903 unique barcoded insertions at 60940 different locations on the chromosome.  
369 The median number of barcoded strains per protein-encoding gene (that tolerated Tn insertion)  
370 was 34; the mean was 49.6. Median number of sequencing reads per hit protein-encoding gene  
371 was 4064; mean was 6183.5. All code used for this mapping and analysis is available at  
372 <https://bitbucket.org/berkeleylab/feba/>.

373

#### 374 *Adhesion profiling of the $lovK_{H180A}$ Tn-Himar mutant library*

375 Adhesion profiling followed the protocol originally outlined in Hershey et al. [19]. 1 ml aliquots of  
376 the barcoded transposon library were cultured, collected by centrifugation, and resuspended in 1  
377 ml of M2X medium. 300  $\mu$ l of this barcoded mutant pool was inoculated into a well of a 12-well  
378 microtiter plate containing 1.5 ml M2X defined medium with 6-8 ~1 x 1 cm layers of cheesecloth.  
379 These microtiter plates were incubated for 24 hours at 30°C with shaking at 155 rpm after which  
380 150  $\mu$ l of the culture was passaged by inoculating into a well with 1.65 ml fresh M2X containing  
381 cheesecloth. Cells from an additional 500  $\mu$ l of medium from each well was harvested by



382 centrifugation and stored at -20°C for barcode sequencing (BarSeq) analysis. Each passaging  
383 experiment was performed in triplicate, and passaging was performed sequentially for a total of  
384 five rounds of selection. Identical cultures grown in a plate without cheesecloth were used as a  
385 nonselective reference condition.

386 Cell pellets were used as PCR templates to amplify the barcodes in each sample using  
387 indexed primers [56]. Amplified products were purified and pooled for multiplexed sequencing. 50  
388 bp single end reads were collected on an Illumina HiSeq4000. The Perl and R scripts  
389 MultiCodes.pl, combineBarSeq.pl and FEBA.R were used to determine fitness scores for each  
390 gene by comparing the  $\log_2$  ratios of barcode counts in each sample over the counts from a  
391 nonselective growth in M2X without cheesecloth. To evaluate mutant phenotypes in each  
392 selection, the replicates were used to calculate a mean fitness score for each gene after each  
393 passage. Mean fitness (a proxy for adhesion to cheesecloth) was assessed across passages for  
394 each gene.

395

#### 396 *Plasmid and strain construction*

397 Plasmids were cloned using standard molecular biology techniques and the primers listed in Table  
398 S4. To construct pPTM051, *CCNA\_03380* (-21 to +15 bp relative to the start of the gene) was  
399 fused to *mNeonGreen* and cloned into pMT805 lacking the xylose-inducible promoter [58]. To  
400 construct pPTM056, site directed mutagenesis was used to introduce a silent mutation in the  
401 chloramphenicol acetyltransferase gene of pPTM051 to remove an EcoRI site. A cumate-  
402 inducible, integrating plasmid was constructed by fusing a backbone with a chloramphenicol  
403 resistance marker derived from pMT681 [58], the xylose integration site derived from pMT595  
404 [58], and the cumate-responsive repressor and promoter derived from pQF through Gibson  
405 Assembly [59]. To construct pPTM057, the xylose integration site, cumate repressor, and cumate-  
406 inducible promoter of pPTM052 were fused to a backbone with a kanamycin resistance marker

407 derived from pMT426 [58]. For reporter plasmids, inserts were cloned into the replicating plasmid  
408 pPTM056. For overexpression constructs, inserts were cloned into pPTM057 or pMT604 that  
409 integrate at the xylose locus and contain either a cumate- ( $P_{Q5}$ ) or xylose-inducible ( $P_{xyI}$ ) promoter,  
410 respectively [58]. For 3xFLAG-tagged RtrC overexpression, inserts were cloned into the  
411 replicating plasmid pQF [59]. Deletion inserts were constructed by overlap PCR with regions up-  
412 and downstream of the target gene and cloned into the pNPTS138 plasmid. Clones were  
413 confirmed with Sanger sequencing.

414 Plasmids were transformed into *C. crescentus* by either electroporation or triparental mating [55].  
415 Transformants generated by electroporation were selected on PYE agar supplemented with the  
416 appropriate antibiotic. Strains constructed by triparental mating were selected on PYE agar  
417 supplemented with the appropriate antibiotic and nalidixic acid to counterselect against *E. coli*.  
418 Gene deletions and allele replacements were constructed using a standard two-step  
419 recombination/counter-selection method, using *sacB* as the counterselection marker. Briefly,  
420 pNPTS138-derived plasmids were transformed into *C. crescentus* and primary integrants were  
421 selected on PYE/kanamycin plates. Primary integrants were incubated overnight in PYE broth  
422 without selection. Cultures were plated on PYE agar plates supplemented with 3% (w/v) sucrose  
423 to select for recombinants that had lost the plasmid. Mutants were confirmed by PCR amplification  
424 of the gene of interest from sucrose resistant, kanamycin sensitive clones.

425

#### 426 *Holdfast imaging and quantification*

427 Strains were inoculated in triplicate in M2X or PYE, containing 50  $\mu$ M cumate when appropriate,  
428 and grown overnight at 30°C. Strains were subcultured in M2X or PYE, containing 50  $\mu$ M cumate  
429 when appropriate, and grown for 3-8 hours at 30°C. Cultures were diluted to 0.0000057 – 0.00045  
430 OD<sub>660</sub> and incubated at 30°C until reaching 0.05 – 0.1 OD<sub>660</sub>. For stationary phase cells, cultures  
431 were diluted to 0.05 OD<sub>660</sub> and incubated at 30°C for 24 hours. Alexa594-conjugated wheat germ  
432 agglutinin (WGA) (ThermoFisher) was added to the cultures with a final concentration of 2.5  $\mu$ g

433 ml<sup>-1</sup>. Cultures were shaken at 30°C for 10 min at 200 rpm. Then, 1.5 ml early log phase culture or  
434 0.75 ml stationary phase culture was centrifuged at 12,000 x g for 2 min and supernatant was  
435 removed. Pellets from early log phase in M2X and PYE were resuspended in 35 µl M2X or 100  
436 µl H<sub>2</sub>O, respectively. Pellets from stationary phase in PYE were resuspended in 400 µl H<sub>2</sub>O. Cells  
437 were spotted on 1% (w/v) agarose pads in H<sub>2</sub>O and imaged with a Leica DMI6000 B microscope.  
438 WGA staining was visualized with Leica TXR ET (No. 11504207, EX: 540-580, DC: 595, EM: 607-  
439 683) filter. Cells with and without holdfasts were enumerated using the image analysis suite, FIJI.  
440 Statistical analysis was carried out in GraphPad 9.3.1.

441  
442 *Structure prediction and comparison*  
443 The structure of CCNA\_00551 was predicted with AlphaFold [24] through Google Colab using the  
444 ChimeraX interface [60]. The predicted structure from AlphaFold was submitted to the Dali server  
445 [25] for structural comparison to the Protein Data Bank (PDB).

446  
447 *Chromatin immunoprecipitation sequencing (ChIP-seq)*  
448 Strains were incubated in triplicate at 30°C overnight in 10 ml PYE supplemented with 2 µg/ml  
449 oxytetracycline. Then, 5 ml overnight culture was diluted into 46 ml PYE supplemented with 2  
450 µg/ml oxytetracycline, grown at 30°C for 2 hours. Cumate was added to a final concentration of  
451 50 µM and cultures were grown at 30°C for 6 hours. Cultures were crosslinked with 1% (w/v)  
452 formaldehyde for 10 min, then crosslinking was quenched by addition of 125 mM glycine for 5  
453 min. Cells were centrifuged at 7196 x g for 5 min at 4°C, supernatant was removed, and pellets  
454 were washed in 25 ml 1x cold PBS pH 7.5 three times. Pellets were resuspended in 1 ml [10 mM  
455 Tris pH 8 at 4°C, 1 mM EDTA, protease inhibitor tablet, 1 mg ml<sup>-1</sup> lysozyme] and incubated at  
456 37°C for 30 min. Sodium dodecyl sulfate (SDS) was added to a final concentration of 0.1% (w/v)  
457 and DNA was sheared to 300-500 bp fragments by sonication for 10 cycles (20 sec on/off). Debris  
458 was centrifuged at 15,000 x g for 10 min at 4°C, supernatant was transferred, and Triton X-100

459 was added to a final concentration of 1% (v/v). Samples were pre-cleared through incubation with  
460 30  $\mu$ l SureBeads™ Protein A magnetic beads for 30 min at room temp. Supernatant was  
461 transferred and 5% lysate was removed for use as input DNA.

462 For pulldown, 100  $\mu$ l Pierce™ anti-FLAG magnetic agarose beads (25% slurry) were equilibrated  
463 overnight at 4°C in binding buffer [10 mM Tris pH 8 at 4°C, 1 mM EDTA, 0.1% (w/v) SDS, 1%  
464 (v/v) Triton X-100] supplemented with 1% (w/v) bovine serum albumin (BSA). Pre-equilibrated  
465 beads were washed four times in binding buffer, then incubated with the remaining lysate for 3  
466 hours at room temperature. Beads were washed with low-salt buffer [50 mM HEPES pH 7.5, 1%  
467 (v/v) Triton X-100, 150 mM NaCl], high-salt buffer [50 mM HEPES pH 7.5, 1% (v/v) Triton X-100,  
468 500 mM NaCl], and LiCl buffer [10 mM Tris pH 8 at 4°C, 1 mM EDTA, 1% (w/v) Triton X-100,  
469 0.5% (v/v) IGEPAL® CA-630, 150 mM LiCl]. To elute protein-DNA complexes, beads were  
470 incubated for 30 min at room temperature with 100  $\mu$ l elution buffer [10 mM Tris pH 8 at 4°C, 1  
471 mM EDTA, 1% (w/v) SDS, 100 ng  $\mu$ l<sup>-1</sup> 3xFLAG peptide] twice. Elutions were supplemented with  
472 NaCl and RNase A to a final concentration of 300 mM and 100  $\mu$ g ml<sup>-1</sup>, respectively, and incubated  
473 at 37°C for 30 min. Then, samples were supplemented with Proteinase K to a final concentration  
474 of 200  $\mu$ g ml<sup>-1</sup> and incubate overnight at 65°C to reverse crosslinks. Input and elutions were  
475 purified with the Zymo ChIP DNA Clean & Concentrator™ kit and libraries were prepared and  
476 sequenced at the Microbial Genome Sequencing Center (Pittsburgh, PA). Raw chromatin  
477 immunoprecipitation sequencing data are available in the NCBI GEO database under series  
478 accession GSE201499.

479

#### 480 *ChIP-seq analysis*

481 Paired-end reads were mapped to the *C. crescentus* NA1000 reference genome (GenBank  
482 accession number CP001340) with Bowtie2 on Galaxy. Peak calling was performed with the  
483 Genrich tool (<https://github.com/jsh58/Genrich>) on Galaxy; peaks are presented in Table S3.  
484 Briefly, PCR duplicates were removed from mapped reads, replicates were pooled, input reads

485 were used as the control dataset, and peak were called using the default peak calling option  
486 [Maximum q-value: 0.05, Minimum area under the curve (AUC): 20, Minimum peak length: 0,  
487 Maximum distance between significant sites: 100]. An average AUC  $\geq$  2500 was used as the  
488 cutoff for significant peaks. Distance between called peaks and the nearest transcription start  
489 sites (TSS) (modified from [30]) was analyzed using ChIPpeakAnno [61]. For genes/operons that  
490 did not have an annotated TSS, the +1 residue of the gene (or start of the operon) was designated  
491 as the TSS.

492

#### 493 *RtrC motif discovery*

494 For motif discovery, sequences of enriched ChIP-seq peaks were submitted to the XSTREME  
495 module of MEME suite [29]. For the XSTREME parameters, shuffled input files were used as the  
496 control sequences for the background model, checked for motifs between 6 and 30 bp in length  
497 that had zero or one occurrence per sequence.

498

#### 499 *RNA preparation, sequencing, and analysis*

500 Strains were incubated in quadruplicate at 30°C overnight in M2X broth supplemented with 50  
501  $\mu$ M cumate. Overnight replicate cultures were diluted into fresh M2X/50  $\mu$ M cumate to 0.025 OD<sub>660</sub>  
502 and incubated at 30°C for 8 hours. Cultures were diluted into 10 ml M2X/50  $\mu$ M cumate to 0.001  
503 – 0.003 OD<sub>660</sub> and incubated at 30°C until reaching 0.3 – 0.4 OD<sub>660</sub>. Upon reaching the desired  
504 OD<sub>660</sub>, 6 ml culture was pelleted at 15,000 x g for 1 minute, supernatant was removed, and pellets  
505 were resuspended in 1 ml TRIzol and stored at -80°C. Samples were heated at 65°C for 10 min.  
506 Then, 200  $\mu$ l chloroform was added, samples were vortexed, and incubated at room temperature  
507 for 5 min. Samples were centrifuged at 17,000 x g for 15 min at 4°C, then the upper aqueous  
508 phase was transferred to a fresh tube, an equal volume of 100% isopropanol was added, and  
509 samples were stored at -80°C overnight. Samples were centrifuged at 17,000 x g for 30 min at  
510 4°C, then supernatant was removed. Samples were washed with cold 70% ethanol. Samples

511 were centrifuged at 17,000 x g for 5 min at 4°C, supernatant was removed, and the pellet was  
512 allowed to dry. Pellets were resuspended in 100 µl RNase-free water and incubated at 60°C for  
513 10 min. Samples were treated with TURBO™ DNase and cleaned up with RNeasy Mini Kit  
514 (Qiagen).

515 Library preparation and sequencing was performed at the Microbial Genome Sequencing center  
516 with the Illumina Stranded RNA library preparation and RiboZero Plus rRNA depletion (Pittsburgh,  
517 PA). Reads were mapped to the *C. crescentus* NA1000 reference genome (GenBank accession  
518 number CP001340) using CLC Genomics Workbench 20 (Qiagen). Differential gene expression  
519 was determined with the CLC Genomics Workbench RNA-seq Analysis Tool ( $|\text{fold-change}| \geq 1.5$   
520 and FDR p-value  $\leq 0.001$ ). Raw RNA sequencing data are available in the NCBI GEO database  
521 under series accession GSE201499.

522

#### 523 *RNA-seq and ChIP-seq overlap analysis*

524 The Bioconductor package was used to identify overlap between RtrC-regulated genes defined  
525 by RNA-seq and RtrC binding sites defined by ChIP-seq [61]. Promoters for genes were  
526 designated as the sequence -400 to +100 around the TSS [30]. Overlap between promoters and  
527 RtrC motifs identified from XSTREME was analyzed using ChIPpeakAnno within Bioconductor.  
528 Genes were defined as direct targets of RtrC if their transcript levels were differentially regulated  
529 in the RNA-seq analysis and had an RtrC motif within a promoter for their operon. To analyze  
530 RtrC motif distribution in directly regulated promoters, promoters were grouped based on the  
531 effect of RtrC on gene expression (i.e. upregulated vs. downregulated). The number of predicted  
532 RtrC motifs at each position with these promoters was calculated and plotted. If an operon  
533 contained more than one promoter, then each promoter for that operon that contained an RtrC  
534 motif was analyzed.

535

#### 536 *Analysis of transcription using fluorescent fusions*

537 Strains were incubated in triplicate at 30°C overnight in PYE broth supplemented with 1  $\mu\text{g ml}^{-1}$   
538 chloramphenicol and 50  $\mu\text{M}$  cumate. Overnight cultures were diluted to 0.05  $\text{OD}_{660}$  in  
539 PYE/chloramphenicol/cumate broth and incubated at 30°C for 24 hours. For Figure S3, log phase  
540 (0.144 – 0.296  $\text{OD}_{660}$ ) cultures were diluted to 0.025  $\text{OD}_{660}$  and incubated at 30°C for 48 hours.  
541 Then, 200  $\mu\text{l}$  culture was transferred to a black Costar® 96 well plate with clear bottom (Corning).  
542 Absorbance at 660 nm and fluorescence (excitation =  $497 \pm 10$  nm; emission =  $523 \pm 10$  nm)  
543 were measured in a Tecan Spark 20M plate reader. Fluorescence was normalized to absorbance.  
544 For the *rtrB* reporter, strains were incubated in triplicate at 30°C overnight in PYE broth  
545 supplemented with 1  $\mu\text{g ml}^{-1}$  chloramphenicol. Overnight cultures were diluted to 0.025  $\text{OD}_{660}$  in  
546 PYE broth supplemented with 1  $\mu\text{g ml}^{-1}$  chloramphenicol, 50  $\mu\text{M}$  cumate, and 0.15% (w/v) xylose.  
547 Cultures were incubated at 30°C for 24 hours, then 100  $\mu\text{l}$  overnight was diluted with 100  $\mu\text{l}$  PYE  
548 and transferred to a black Costar® 96 well plate with clear bottom (Corning). Fluorescence and  
549 absorbance were measured as indicated above in a Tecan Spark 20M plate reader. Fluorescence  
550 was normalized to absorbance. Statistical analysis was carried out in GraphPad 9.3.1.

551  
552 *Protein purification*  
553 For heterologous expression of RtrC, plasmids were transformed into the BL21 Rosetta  
554 (DE3)/pLysS background. Strains were inoculated into 20 ml LB broth supplemented with 100  $\mu\text{g}$   
555  $\text{ml}^{-1}$  carbenicillin and incubated overnight at 37°C. Overnight cultures were diluted into 1000 ml  
556 LB supplemented with carbenicillin and grown for 3 – 4 hours at 37°C. Protein expression was  
557 induced by 0.5 mM isopropyl  $\beta$ -D-1-thiogalactopyranoside (IPTG) and incubation at 37°C for 3 –  
558 4.5 hours. Cells were pelleted at 11,000 x g for 7 min at 4°C, pellets were resuspended in 25 ml  
559 lysis buffer [25 mM Tris pH 8 at 4°C, 500 mM NaCl, 10 mM imidazole], and stored at -80°C.  
560 Samples were thawed, supplemented with PMSF and benzonase to a final concentration of 1 mM  
561 and 50 Units  $\text{ml}^{-1}$ , respectively. Samples were sonicated with a Branson Digital Sonifier at 20%  
562 output in 20" intervals until sufficiently lysed and clarified by centrifugation at 39,000 x g for 15

563 min at 4°C. Clarified lysates were batch incubated with 4 ml Ni-NTA Superflow Resin (50% slurry)  
564 that had been pre-equilibrated in lysis buffer for 60 min at 4°C. Column was then washed with 25  
565 ml lysis buffer, high salt buffer [25 mM Tris pH 8 at 4°C, 1 M NaCl, 30 mM imidazole], and low  
566 salt buffer [25 mM Tris pH 8 at 4°C, 500 mM NaCl, 30 mM imidazole]. For elution, column was  
567 batch incubated with 25 ml elution buffer [25 mM Tris pH 8 at 4°C, 500 mM NaCl, 300 mM  
568 imidazole] for 60 min at 4°C.  
569 Elution was supplemented with ULP1 protease to cleave the His<sub>6</sub>-SUMO tag and dialyzed in 1 L  
570 dialysis buffer [25 mM Tris pH 8 at 4°C, 500 mM NaCl] overnight at 4°C. Dialyzed sample was  
571 batch incubated with 4 ml Ni-NTA Superflow Resin (50% slurry) that had been pre-equilibrated in  
572 dialysis buffer for 60 min at 4°C. Flowthrough that contained untagged RtrC was collected and  
573 concentrated on an Amicon® Ultra-15 concentrator (3 kDa cutoff) at 4,000 x g at 4°C. Samples  
574 were stored at 4°C until needed.

575

#### 576 *Electrophoretic mobility shift assay (EMSA)*

577 To prepare labeled DNA fragments, an Alexa488-labeled universal forward primer and an *hfiA*  
578 specific reverse primer listed in Table S4 were annealed in a thermocycler in as follows: 94°C for  
579 5 min, then ramp down to 18°C at 0.1°C s<sup>-1</sup>. Overhangs were filled in with DNA polymerase I,  
580 Large Klenow fragment at 25°C for 60 min. DNA fragments were then treated with Mung Bean  
581 Nuclease for 120 min at 30°C to remove any remaining overhangs. DNA fragments were purified  
582 with the GeneJet PCR purification kit, eluted in 10 mM TE/NaCl [Tris pH 8 at 4°C, 1 mM EDTA,  
583 50 mM NaCl], and diluted to 0.5 μM in TE/NaCl. Unlabeled DNA fragments were prepared by  
584 annealing primers listed in Table S4 with protocol listed above. For non-specific chase, the  
585 sequence of the *hfiA* specific probe was shuffled.

586 RtrC was incubated with 6.25 nM labeled DNA in binding buffer at 20°C for 30 min in the dark and  
587 subsequently cooled to 4°C on ice. For EMSA to analyze binding curves, DNA binding buffer  
588 consisted of 32.5 mM Tris pH 8 at 4°C, 200 mM NaCl, 1 mM EDTA, 30% (v/v) glycerol, 1 mM



589 DTT, 10  $\mu\text{g ml}^{-1}$  BSA, and 50  $\text{ng } \mu\text{l}^{-1}$  poly(dI-dC). For EMSAs with unlabeled chases, DNA binding  
590 buffer consisted of 30 mM Tris pH 8 at 4°C, 150 mM NaCl, 1 mM EDTA, 30% (v/v) glycerol, 1 mM  
591 DTT, 10  $\mu\text{g ml}^{-1}$  BSA, and 50  $\text{ng } \mu\text{l}^{-1}$  poly(dI-dC). For non-specific and specific chases, reactions  
592 were supplemented with 2.5  $\mu\text{M}$  unlabeled DNA. Then, 15  $\mu\text{l}$  reaction was loaded on to a  
593 degassed polyacrylamide gel [10% (v/v) acrylamide (37.5:1 acrylamide:bis-acrylamide), 0.5x  
594 Tris-Borate-EDTA buffer (TBE: 45 mM Tris, 45 mM borate, 1 mM EDTA)] and run at 100 V for 40  
595 min at 4°C in 0.5x TBE buffer. Gels were imaged on a ChemiDoc™ MP imaging system [Light:  
596 blue epi illumination, Filter: 530/28, Exposure: 30 sec] and bands were quantified with FIJI. For  
597 calculating  $k_d$ , percent bound probe at each protein concentration was calculated as  $(1 - [\text{intensity}$   
598  $\text{free probe at } x \text{ nM protein}]/[\text{intensity of free probe at } 0 \text{ nM protein}])$ . Binding curve was derived  
599 from One site – specific binding analysis using GraphPad 9.3.1.

600

#### 601 *Soft agar swarm assay*

602 Strains were incubated in quadruplicate at 30°C overnight in PYE broth supplemented with 50  $\mu\text{M}$   
603 cumate. Overnight cultures were diluted to 0.05  $\text{OD}_{660}$  in PYE/50  $\mu\text{M}$  cumate, then incubated at  
604 30°C for 24 hours. Cultures were diluted to 0.5  $\text{OD}_{660}$  in PYE broth, 0.75  $\mu\text{l}$  diluted culture was  
605 pipetted into PYE plate supplemented with 50  $\mu\text{M}$  cumate, incubated at 30°C for 3 days. Plates  
606 were imaged on a ChemiDoc™ MP imaging system and swarm size was measured with FIJI.  
607 Statistical analysis was carried out in GraphPad 9.3.1.

608

## 609 References

- 610 1. Dufrene, Y.F. and A. Persat, *Mechanobiology: how bacteria sense and respond to*  
611 *forces*. Nat Rev Microbiol, 2020. **18**(4): p. 227-240.
- 612 2. Figueiredo, A.M.S., et al., *The role of biofilms in persistent infections and factors involved*  
613 *in ica-independent biofilm development and gene regulation in Staphylococcus aureus*.  
614 Crit Rev Microbiol, 2017. **43**(5): p. 602-620.
- 615 3. Moons, P., C.W. Michiels, and A. Aertsen, *Bacterial interactions in biofilms*. Crit Rev  
616 Microbiol, 2009. **35**(3): p. 157-68.
- 617 4. Reguera, G. and K. Kashefi, *The electrifying physiology of Geobacter bacteria, 30 years*  
618 *on*. Adv Microb Physiol, 2019. **74**: p. 1-96.
- 619 5. Deschaine, B.M., et al., *Biofilm formation and toxin production provide a fitness advantage*  
620 *in mixed colonies of environmental yeast isolates*. Ecol Evol, 2018. **8**(11): p. 5541-5550.
- 621 6. Harrison, J.J., H. Ceri, and R.J. Turner, *Multimetal resistance and tolerance in microbial*  
622 *biofilms*. Nat Rev Microbiol, 2007. **5**(12): p. 928-38.
- 623 7. Seiler, C., et al., *Grazing resistance of bacterial biofilms: a matter of predators' feeding*  
624 *trait*. FEMS Microbiol Ecol, 2017. **93**(9).
- 625 8. Lowery, N.V., et al., *Division of Labor, Bet Hedging, and the Evolution of Mixed Biofilm*  
626 *Investment Strategies*. mBio, 2017. **8**(4).
- 627 9. Wilhelm, R.C., *Following the terrestrial tracks of Caulobacter - redefining the ecology of a*  
628 *reputed aquatic oligotroph*. ISME J, 2018. **12**(12): p. 3025-3037.
- 629 10. Niederdorfer, R., et al., *Ecological strategies and metabolic trade-offs of complex*  
630 *environmental biofilms*. NPJ Biofilms Microbiomes, 2017. **3**: p. 21.
- 631 11. Tsang, P.H., et al., *Adhesion of single bacterial cells in the micronewton range*. Proc Natl  
632 Acad Sci U S A, 2006. **103**(15): p. 5764-8.
- 633 12. Entcheva-Dimitrov, P. and A.M. Spormann, *Dynamics and control of biofilms of the*  
634 *oligotrophic bacterium Caulobacter crescentus*. J Bacteriol, 2004. **186**(24): p. 8254-66.
- 635 13. McGrath, P.T., et al., *High-throughput identification of transcription start sites, conserved*  
636 *promoter motifs and predicted regulons*. Nat Biotechnol, 2007. **25**(5): p. 584-92.
- 637 14. Schrader, J.M., et al., *Dynamic translation regulation in Caulobacter cell cycle control*.  
638 Proc Natl Acad Sci U S A, 2016. **113**(44): p. E6859-E6867.
- 639 15. Ellison, C.K., et al., *Obstruction of pilus retraction stimulates bacterial surface sensing*.  
640 Science, 2017. **358**(6362): p. 535-538.
- 641 16. Hug, I., et al., *Second messenger-mediated tactile response by a bacterial rotary motor*.  
642 Science, 2017. **358**(6362): p. 531-534.
- 643 17. Sprecher, K.S., et al., *Cohesive Properties of the Caulobacter crescentus Holdfast*  
644 *Adhesin Are Regulated by a Novel c-di-GMP Effector Protein*. mBio, 2017. **8**(2).
- 645 18. Reyes Ruiz, L.M., A. Fiebig, and S. Crosson, *Regulation of bacterial surface attachment*  
646 *by a network of sensory transduction proteins*. PLoS Genet, 2019. **15**(5): p. e1008022.
- 647 19. Hershey, D.M., A. Fiebig, and S. Crosson, *A Genome-Wide Analysis of Adhesion in*  
648 *Caulobacter crescentus Identifies New Regulatory and Biosynthetic Components for*  
649 *Holdfast Assembly*. mBio, 2019. **10**(1).
- 650 20. da Silva, C.A., et al., *Transcriptomic analysis of the stationary phase response regulator*  
651 *SpdR in Caulobacter crescentus*. BMC Microbiol, 2016. **16**: p. 66.
- 652 21. Blum, M., et al., *The InterPro protein families and domains database: 20 years on*. Nucleic  
653 Acids Res, 2021. **49**(D1): p. D344-D354.
- 654 22. Marchler-Bauer, A., et al., *CDD: conserved domains and protein three-dimensional*  
655 *structure*. Nucleic Acids Res, 2013. **41**(Database issue): p. D348-52.
- 656 23. Kelley, L.A., et al., *The Phyre2 web portal for protein modeling, prediction and analysis*.  
657 Nat Protoc, 2015. **10**(6): p. 845-58.

- 658 24. Jumper, J., et al., *Highly accurate protein structure prediction with AlphaFold*. Nature,  
659 2021. **596**(7873): p. 583-589.
- 660 25. Holm, L., *Using Dali for Protein Structure Comparison*. Methods Mol Biol, 2020. **2112**: p.  
661 29-42.
- 662 26. Kumaraswami, M., et al., *Structural and biochemical characterization of MepR, a multidrug*  
663 *binding transcription regulator of the Staphylococcus aureus multidrug efflux pump MepA*.  
664 Nucleic Acids Res, 2009. **37**(4): p. 1211-24.
- 665 27. Schrader, J.M., et al., *The coding and noncoding architecture of the Caulobacter*  
666 *crenscentus genome*. PLoS Genet, 2014. **10**(7): p. e1004463.
- 667 28. Zhou, B., et al., *The global regulatory architecture of transcription during the Caulobacter*  
668 *cell cycle*. PLoS Genet, 2015. **11**(1): p. e1004831.
- 669 29. Grant, C.E. and T.L. Bailey, *XSTREME: Comprehensive motif analysis of biological*  
670 *sequence datasets*. bioRxiv, 2021.
- 671 30. Bharmal, M.H., J.R. Aretakis, and J.M. Schrader, *An Improved Caulobacter crescentus*  
672 *Operon Annotation Based on Transcriptome Data*. Microbiol Resour Announc, 2020.  
673 **9**(44).
- 674 31. Babu, M.M. and S.A. Teichmann, *Functional determinants of transcription factors in*  
675 *Escherichia coli: protein families and binding sites*. Trends Genet, 2003. **19**(2): p. 75-9.
- 676 32. Mangan, S. and U. Alon, *Structure and function of the feed-forward loop network motif*.  
677 Proc Natl Acad Sci U S A, 2003. **100**(21): p. 11980-5.
- 678 33. da Silva, C.A., et al., *SpdR, a response regulator required for stationary-phase induction*  
679 *of Caulobacter crescentus cspD*. J Bacteriol, 2010. **192**(22): p. 5991-6000.
- 680 34. Britos, L., et al., *Regulatory response to carbon starvation in Caulobacter crescentus*.  
681 PLoS One, 2011. **6**(4): p. e18179.
- 682 35. Biondi, E.G., et al., *Regulation of the bacterial cell cycle by an integrated genetic circuit*.  
683 Nature, 2006. **444**(7121): p. 899-904.
- 684 36. Boutte, C.C. and S. Crosson, *The complex logic of stringent response regulation in*  
685 *Caulobacter crescentus: starvation signalling in an oligotrophic environment*. Mol  
686 Microbiol, 2011. **80**(3): p. 695-714.
- 687 37. Kaatz, G.W., C.E. DeMarco, and S.M. Seo, *MepR, a repressor of the Staphylococcus*  
688 *aureus MATE family multidrug efflux pump MepA, is a substrate-responsive regulatory*  
689 *protein*. Antimicrob Agents Chemother, 2006. **50**(4): p. 1276-81.
- 690 38. Hong, M., et al., *Structure of an OhrR-ohrA operator complex reveals the DNA binding*  
691 *mechanism of the MarR family*. Mol Cell, 2005. **20**(1): p. 131-41.
- 692 39. Dolan, K.T., E.M. Duguid, and C. He, *Crystal structures of SlyA protein, a master virulence*  
693 *regulator of Salmonella, in free and DNA-bound states*. J Biol Chem, 2011. **286**(25): p.  
694 22178-85.
- 695 40. Bervoets, I. and D. Charlier, *Diversity, versatility and complexity of bacterial gene*  
696 *regulation mechanisms: opportunities and drawbacks for applications in synthetic biology*.  
697 FEMS Microbiol Rev, 2019. **43**(3): p. 304-339.
- 698 41. Fiebig, A., et al., *A cell cycle and nutritional checkpoint controlling bacterial surface*  
699 *adhesion*. PLoS Genet, 2014. **10**(1): p. e1004101.
- 700 42. Berne, C., et al., *Feedback regulation of Caulobacter crescentus holdfast synthesis by*  
701 *flagellum assembly via the holdfast inhibitor HfiA*. Mol Microbiol, 2018. **110**(2): p. 219-238.
- 702 43. Lori, C., et al., *A Single-Domain Response Regulator Functions as an Integrating Hub To*  
703 *Coordinate General Stress Response and Development in Alphaproteobacteria*. mBio,  
704 2018. **9**(3).
- 705 44. Crosson, S., et al., *Conserved modular design of an oxygen sensory/signaling network*  
706 *with species-specific output*. Proc Natl Acad Sci U S A, 2005. **102**(22): p. 8018-23.

- 707 45. Osamura, T., et al., *Specific expression and function of the A-type cytochrome c oxidase*  
708 *under starvation conditions in Pseudomonas aeruginosa*. PLoS One, 2017. **12**(5): p.  
709 e0177957.
- 710 46. Abel, S., et al., *Bi-modal distribution of the second messenger c-di-GMP controls cell fate*  
711 *and asymmetry during the caulobacter cell cycle*. PLoS Genet, 2013. **9**(9): p. e1003744.
- 712 47. Christen, M., et al., *DgrA is a member of a new family of cyclic diguanosine*  
713 *monophosphate receptors and controls flagellar motor function in Caulobacter crescentus*.  
714 Proc Natl Acad Sci U S A, 2007. **104**(10): p. 4112-7.
- 715 48. Kalir, S., S. Mangan, and U. Alon, *A coherent feed-forward loop with a SUM input function*  
716 *prolongs flagella expression in Escherichia coli*. Mol Syst Biol, 2005. **1**: p. 2005 0006.
- 717 49. Mangan, S., A. Zaslaver, and U. Alon, *The coherent feedforward loop serves as a sign-*  
718 *sensitive delay element in transcription networks*. J Mol Biol, 2003. **334**(2): p. 197-204.
- 719 50. Swem, L.R., et al., *Signal transduction by the global regulator RegB is mediated by a*  
720 *redox-active cysteine*. EMBO J, 2003. **22**(18): p. 4699-708.
- 721 51. Wu, J., et al., *RegB kinase activity is repressed by oxidative formation of cysteine sulfenic*  
722 *acid*. J Biol Chem, 2013. **288**(7): p. 4755-62.
- 723 52. Wu, J. and C.E. Bauer, *RegB kinase activity is controlled in part by monitoring the ratio of*  
724 *oxidized to reduced ubiquinones in the ubiquinone pool*. mBio, 2010. **1**(5).
- 725 53. Swem, L.R., et al., *Identification of a ubiquinone-binding site that affects*  
726 *autophosphorylation of the sensor kinase RegB*. J Biol Chem, 2006. **281**(10): p. 6768-75.
- 727 54. Maniatis, T., E.F. Fritsch, and J. Sambrook, *Molecular cloning : a laboratory manual*. 1982,  
728 Cold Spring Harbor, N.Y.: Cold Spring Harbor Laboratory. x, 545 p.
- 729 55. Ely, B., *Genetics of Caulobacter crescentus*. Methods Enzymol, 1991. **204**: p. 372-84.
- 730 56. Wetmore, K.M., et al., *Rapid quantification of mutant fitness in diverse bacteria by*  
731 *sequencing randomly bar-coded transposons*. mBio, 2015. **6**(3): p. e00306-15.
- 732 57. Kent, W.J., *BLAT--the BLAST-like alignment tool*. Genome Res, 2002. **12**(4): p. 656-64.
- 733 58. Thanbichler, M., A.A. Iniesta, and L. Shapiro, *A comprehensive set of plasmids for*  
734 *vanillate- and xylose-inducible gene expression in Caulobacter crescentus*. Nucleic Acids  
735 Res, 2007. **35**(20): p. e137.
- 736 59. Kaczmarczyk, A., J.A. Vorholt, and A. Francez-Charlot, *Cumate-inducible gene*  
737 *expression system for sphingomonads and other Alphaproteobacteria*. Appl Environ  
738 Microbiol, 2013. **79**(21): p. 6795-802.
- 739 60. Pettersen, E.F., et al., *UCSF ChimeraX: Structure visualization for researchers, educators,*  
740 *and developers*. Protein Sci, 2021. **30**(1): p. 70-82.
- 741 61. Zhu, L.J., et al., *ChIPpeakAnno: a Bioconductor package to annotate ChIP-seq and ChIP-*  
742 *chip data*. BMC Bioinformatics, 2010. **11**: p. 237.

743

744

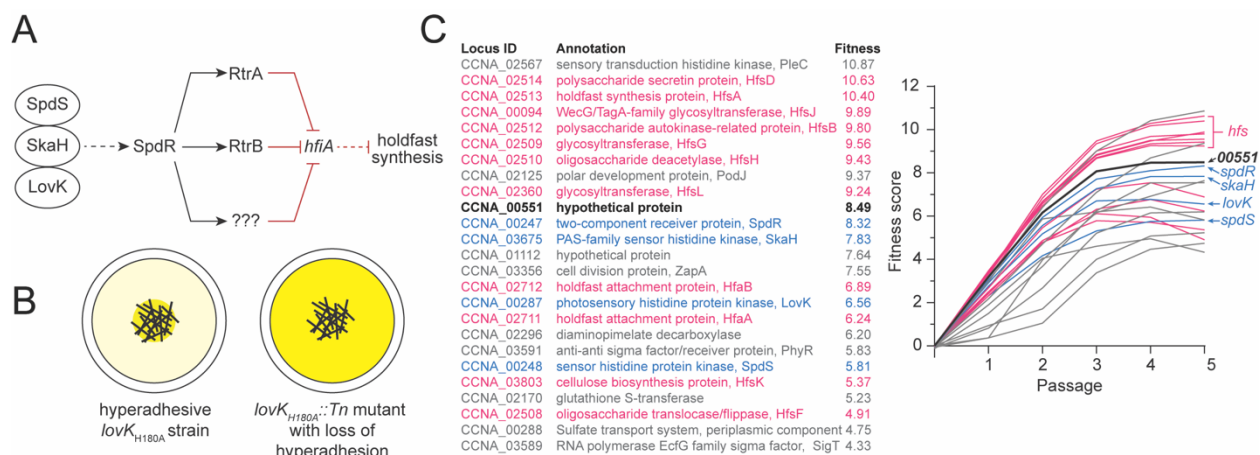

745  
746 **Figure 1. Adhesion TCS pathway and adhesion profiling of *lovK*<sub>H180A</sub>::Tn mutants. A)**  
747 Schematic of the LovK-SkaH-SpdS-SpdR adhesion TCS system that regulates holdfast synthesis  
748 as described by Reyes-Ruiz et al. [18]. Question marks indicate postulated additional regulator(s)  
749 in the adhesion control pathway. Dashed lines indicate post-transcriptional regulation and solid  
750 lines indicate transcriptional regulation. Black arrows indicate activation and red bar-ended lines  
751 indicate repression. **B)** Genetic selection to identify insertions that disrupt the hyper-holdfast  
752 phenotype of *lovK*<sub>H180A</sub>. Tn-*himar* strains are cultivated and serially passaged for five days in the  
753 presence of cheesecloth (black cross-hatched lines in the center of the well). Mutants that do not  
754 permanently adhere to cheesecloth are increasingly enriched in the supernatant with each  
755 passage. Darker yellow color indicates non-adhesive *lovK*<sub>H180A</sub>::Tn strains that are enriched after  
756 five days of serial passaging. **C)** (left) List of the 25 genes for which transposon insertion has the  
757 largest disruptive effect on adhesion of the *lovK*<sub>H180A</sub> strain. (right) Enrichment in the supernatant  
758 is reflected in an increasing calculated fitness score with each daily passage. Mutations that  
759 disrupt *lovK*<sub>H180A</sub> adhesion to cheesecloth include the expected holdfast synthesis and  
760 modification genes (pink), and genes encoding the LovK-SkaH-SpdS-SpdR regulatory system  
761 (blue). The hypothetical gene *CCNA\_00551* is listed in black; all remaining genes are colored  
762 grey.

763

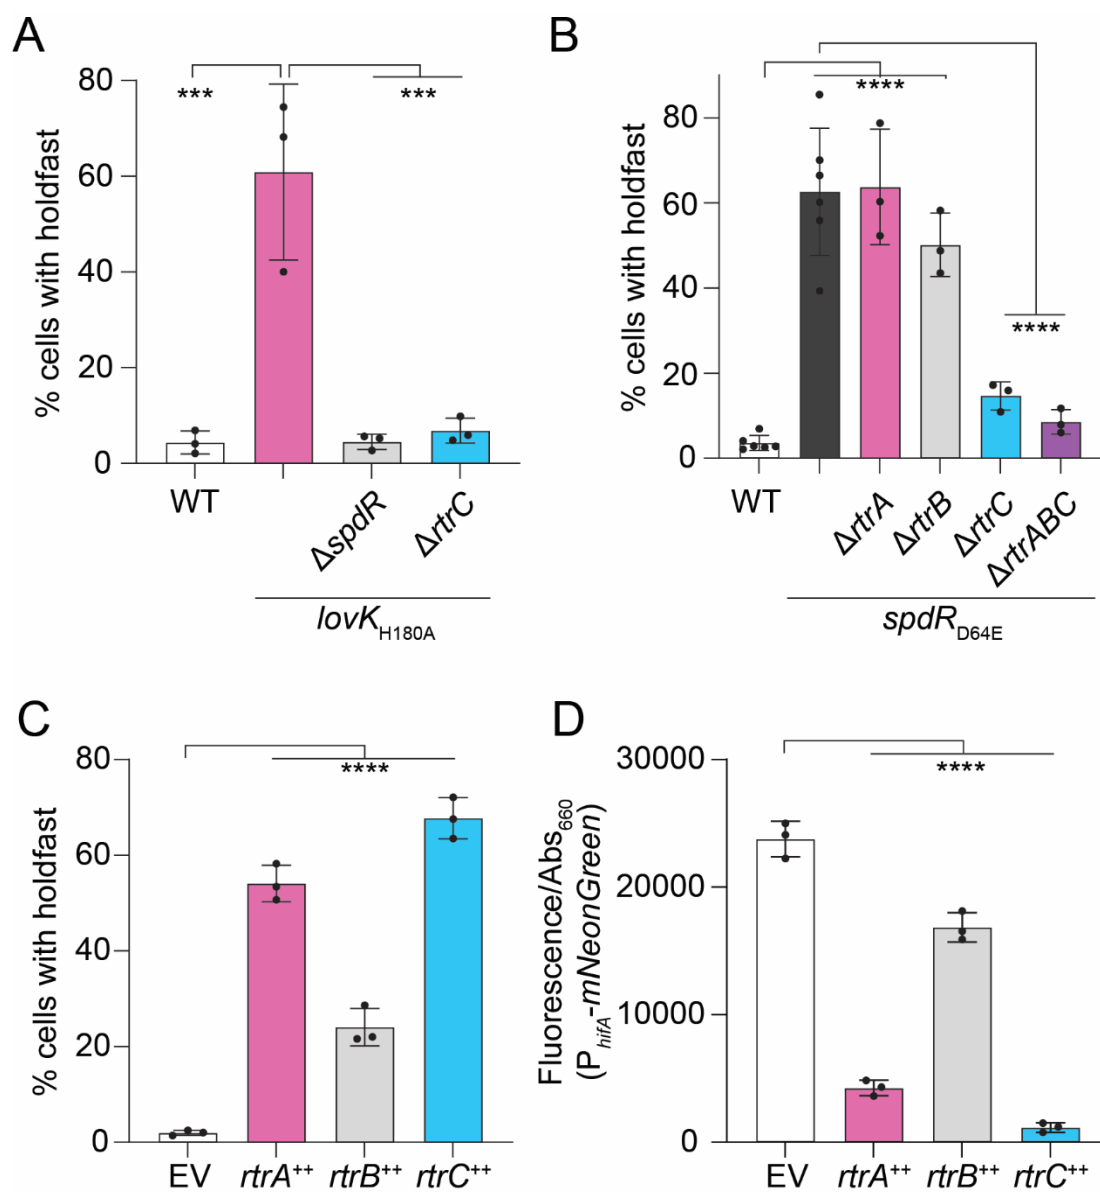

764

765 **Figure 2. CCNA\_00551 (*rtrC*) regulates holdfast synthesis and *hfiA* expression. A)**

766 Percentage of cells with stained holdfast in wild type (WT) or *lovK<sub>H180A</sub>* strains bearing in-frame

767 deletions ( $\Delta$ ) in *spdR* and *CCNA\_00551* (*rtrC*). B) Percentage of cells with stained holdfast in WT,

768 *spdR<sub>D64E</sub>*, or *spdR<sub>D64E</sub>* strains bearing in-frame deletions in *rtrA*, *rtrB*, and *rtrC*. C) Percentage of

769 cells with stained holdfasts in *rtrA*, *rtrB*, and *rtrC* overexpression (++) backgrounds. Stained

770 holdfast were quantified by fluorescence microscopy. D) *hfiA* transcription in *rtrA*, *rtrB*, and *rtrC*

771 overexpression (++) backgrounds as measured using a P<sub>*hfiA*</sub>-mNeonGreen fluorescent reporter.

772 Fluorescence was normalized to cell density; data show the mean fluorescence. Error bars are

773 standard deviation of three biological replicates, except WT and *spdR*<sub>D64E</sub> in panel B, which have  
774 six biological replicates. Statistical significance was determined by one-way ANOVA followed by  
775 **A-B)** Tukey's multiple comparisons test or **C-D)** Dunnett's multiple comparison (p-value  $\leq$   
776 0.001, \*\*\*; p-value  $\leq$  0.0001, \*\*\*\*).  
777

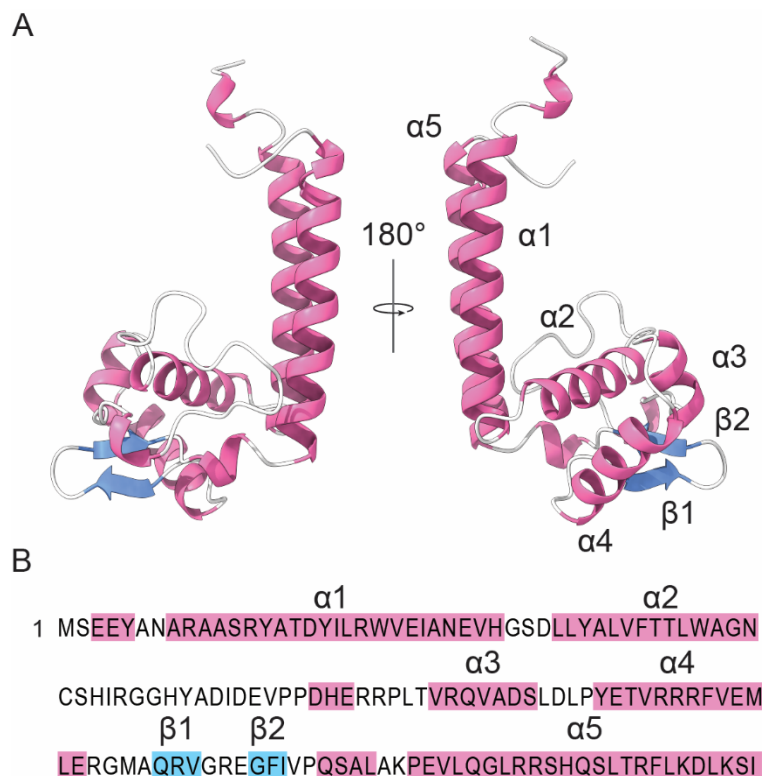

778 GIEAA 146

779 **Figure 3. Structural analysis of RtrC** **A)** Tertiary structure of RtrC predicted by AlphaFold [24].

780 Pink ribbons indicate alpha (α) helices and blue arrows indicate beta (β) strands. Labels (α1-5

781 and β1-2) correspond to the sequence highlighted in panel B. **B)** Primary structure of RtrC. Amino

782 acids highlighted in pink are in predicted α-helices and residues highlighted in blue are in β-

783 strands, as labeled above the sequence.

784



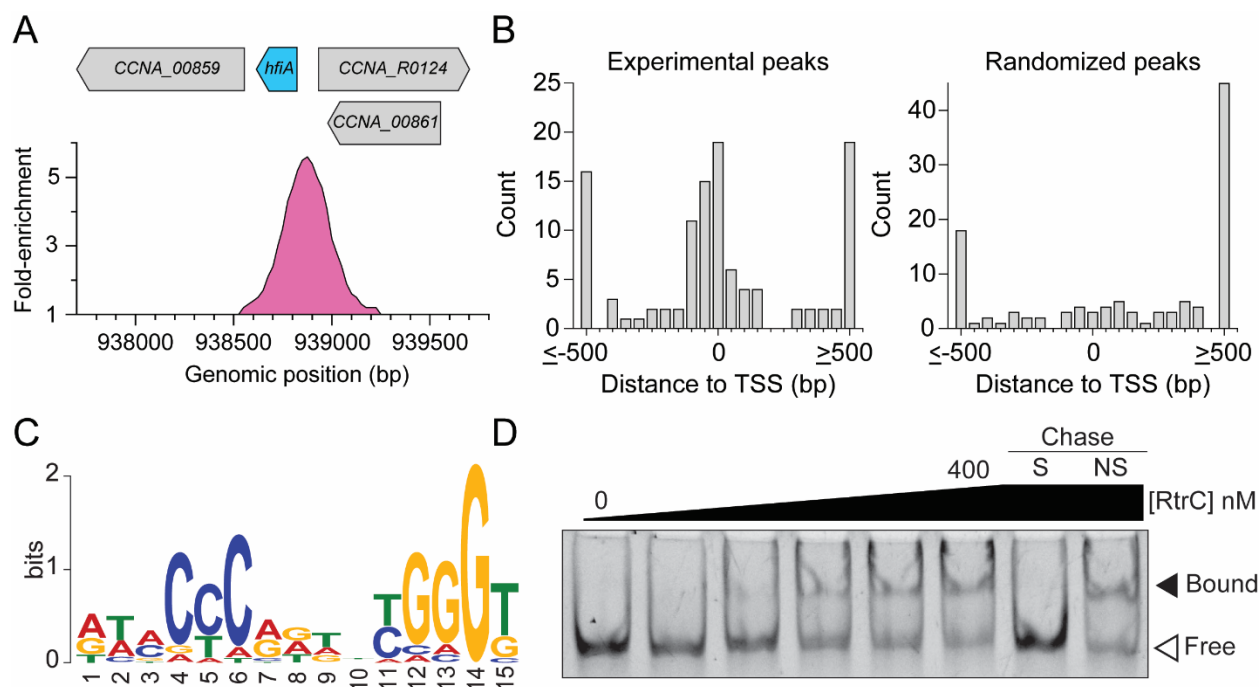

785

786 **Figure 4. RtrC binds DNA *in vivo* and *in vitro*.** **A)** RtrC binds the *hfiA* promoter *in vivo*. ChIP-  
 787 seq profile from RtrC-3xFLAG pulldowns were plotted as fold-enrichment in read counts  
 788 compared to the input control. Genomic position of the binding peak (in pink) on the *C. crescentus*  
 789 chromosome and relative gene locations are marked. **B)** Distribution of RtrC peaks relative to  
 790 experimentally defined transcription start sites (TSS). Distance from summit of RtrC ChIP-seq  
 791 peak or randomized peaks to the nearest TSS (113 peaks) were analyzed and are plotted as a  
 792 histogram. **C)** DNA sequence motif enriched in RtrC ChIP-seq peaks identified by XSTREME [29].  
 793 **D)** Electrophoretic mobility shift assay using purified RtrC and *hfiA* promoter sequence. Increasing  
 794 concentrations of purified RtrC (0, 50, 100, 200, 300, and 400 nM) were incubated with 6.25 nM  
 795 labeled *hfiA* probe. Specific chase (S) and non-specific chase (NS) contained 2.5  $\mu$ M unlabeled  
 796 *hfiA* probe and unlabeled shuffled *hfiA* probe, respectively. Blot is representative of two biological  
 797 replicates.

798

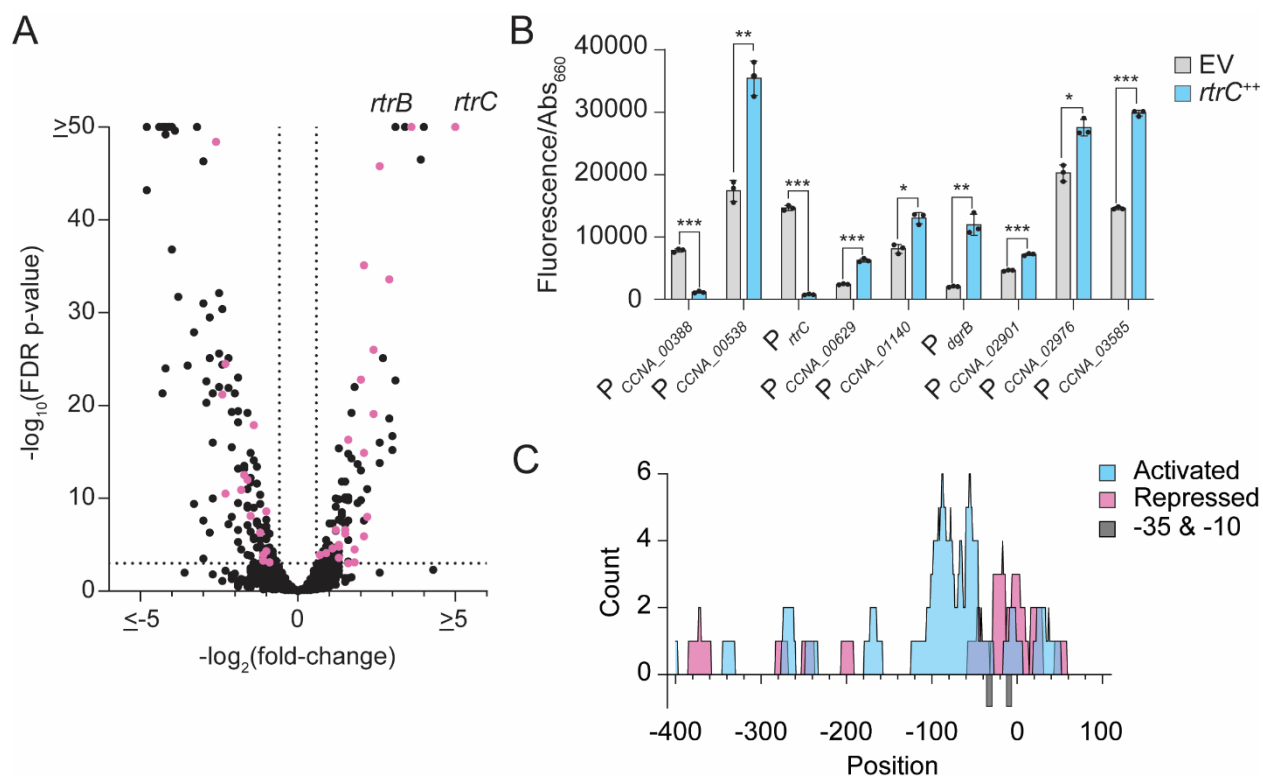

799

800 **Figure 5. RtrC functions as a transcriptional activator and repressor. A)** RNA-seq analysis

801 of genes significantly regulated upon *rtrC* overexpression. Volcano plot showing  $\log_2(\text{fold-change})$

802 in transcript levels in an *rtrC* overexpression strain (*rtrC*<sup>++</sup>) versus empty vector (EV) are plotted

803 against  $-\log_{10}(\text{FDR p-value})$ . Black dots indicate genes without RtrC motifs and pink dots indicate

804 genes with RtrC motifs in their promoters. Data show the mean of three biological replicates. **B)**

805 Transcription from predicted RtrC-regulated promoters measured by promoter fusions to

806 mNeonGreen. Fluorescence measured in *rtrC*<sup>++</sup> or empty vector (EV) backgrounds was

807 normalized to cell density (OD<sub>660</sub>). Data show the mean signal; error bars are standard deviation

808 of three biological replicates. Statistical significance was determined by multiple unpaired t tests,

809 correcting for multiple comparisons using the Holm-Šídák method (p-value  $\leq 0.05$ ,\*; p-value  $\leq$

810 0.01,\*\*; p-value  $\leq 0.001$ ,\*\*\*). **C)** Activity of RtrC as a transcriptional activator or repressor

811 correlates with position of the pseudo-palindromic RtrC motif in the promoter. Distribution of RtrC

812 motifs in promoters (-400 to +100 bp from the transcription start site; TSS) directly regulated by

813 RtrC. Blue indicates motif position in promoters activated by RtrC (n=26) and pink indicates motif

814 position in promoters repressed by RtrC (n=16). Grey bars below the x-axis indicate the -35 and  
815 -10 positions relative to the annotated TSS.  
816

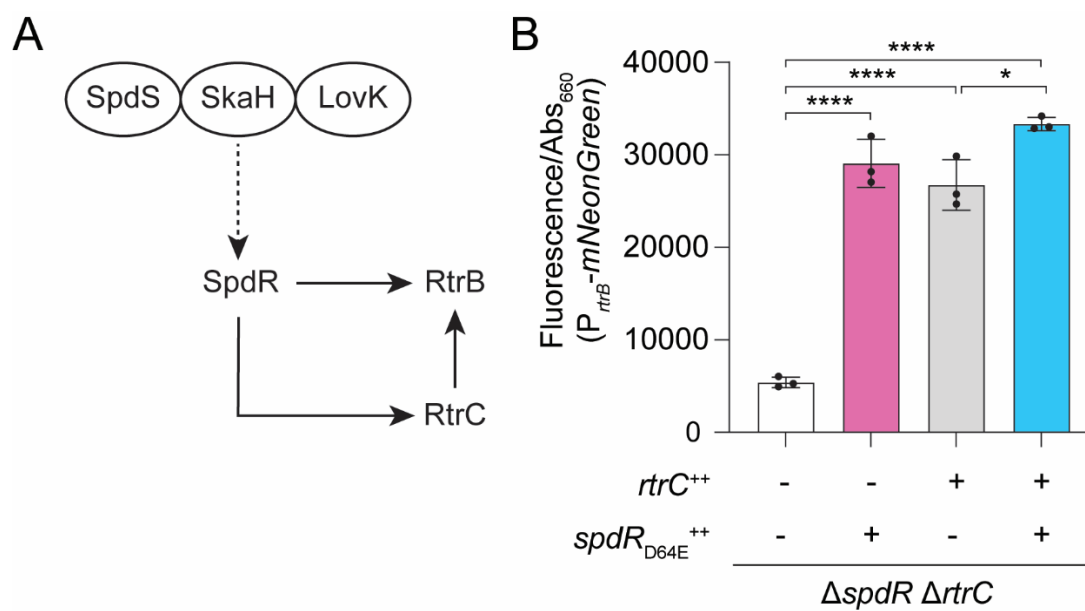

817

818 **Figure 6. *spdR-rtrC-rtrB* form an OR-gated type I coherent feedforward loop. A)** Schematic

819 of the Type I coherent feedforward loop. The sensor histidine kinases SpdS, SkaH, and LovK

820 function upstream and regulate the DNA-binding response regulator, SpdR [18]. SpdR can

821 activate transcription of both *rtrC* and *rtrB*; RtrC activates transcription of *rtrB*. Dashed arrows

822 indicate post-transcriptional activation and solid arrows indicate transcriptional activation. **B)** *rtrB*

823 transcription measured using a  $P_{rtrB}$ -*mNeonGreen* transcriptional reporter; transcription measured

824 upon *rtrC* and/or  $spdR_{D64E}$  overexpression (++). Reporter strains were built in a background in

825 which *rtrC* and *spdR* are deleted from the chromosome ( $\Delta spdR \Delta rtrC$ ). Fluorescence signal was

826 normalized to cell density. Data are the mean; errors bars represent standard deviation of three

827 biological replicates. Statistical significance was determined by one-way ANOVA followed by

828 Tukey's multiple comparisons test (p-value  $\leq 0.05$ ,\*; p-value  $\leq 0.0001$ ,\*\*\*\*).

829

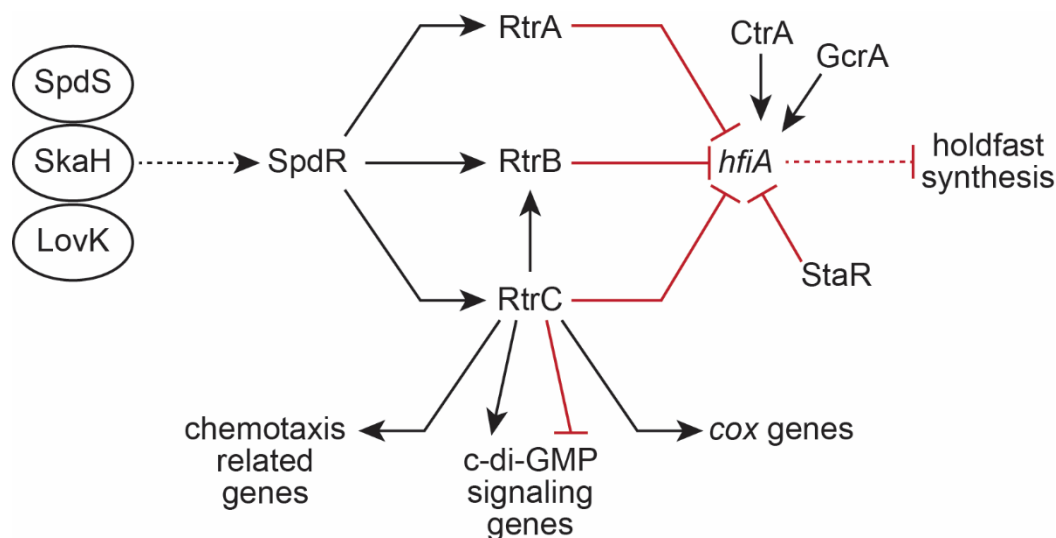

830

831 **Figure 7. *C. crescentus* adhesion TCS regulatory network.** The LovK, SkaH, and SpdS sensor  
832 histidine kinases function upstream of the DNA-binding response regulator, SpdR [18]. SpdR  
833 directly activates transcription of *rtrA*, *rtrB*, and *rtrC*. RtrA, RtrB, RtrC, and the XRE-family  
834 transcription factor, StaR, all directly repress *hfiA* transcription, while the cell cycle regulators CtrA  
835 and GcrA directly activate *hfiA* transcription. In addition to regulating *hfiA*, RtrC can function as a  
836 transcriptional activator and repressor for several groups of genes, including those with predicted  
837 roles in chemotaxis, c-di-GMP signaling, and aerobic respiration (*cox*). Dashed lines indicate post-  
838 transcriptional regulation, solid black arrows indicate transcriptional activation, and red bar-ended  
839 lines indicate transcriptional repression.

840

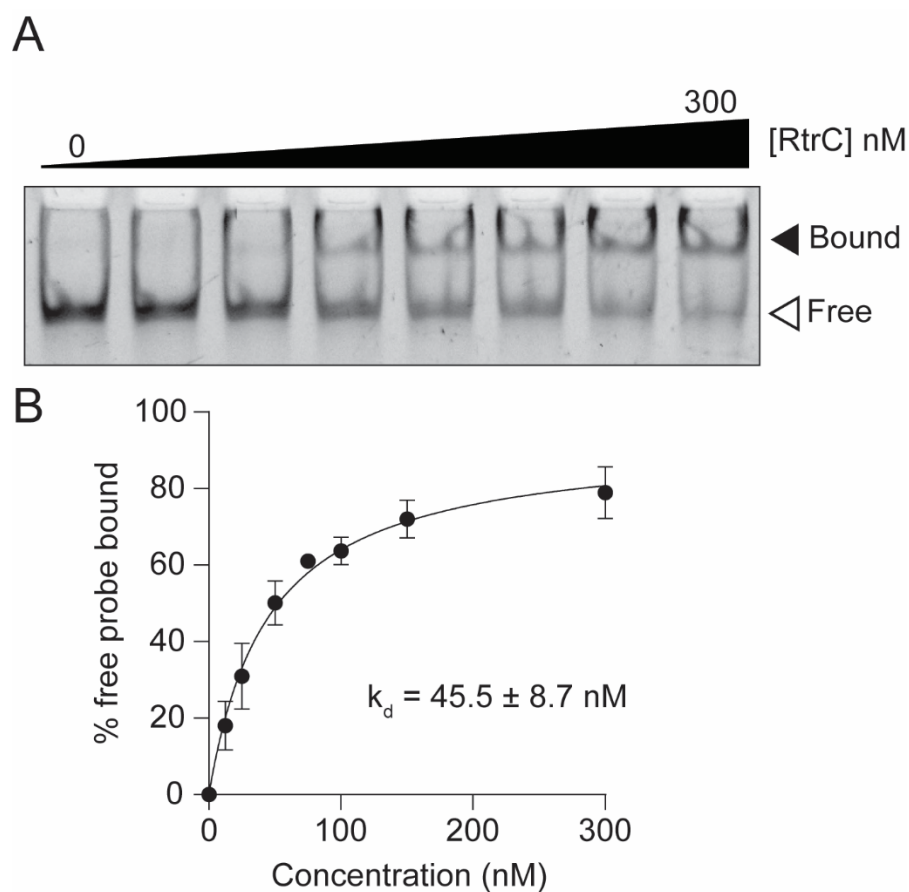

841

842 **Figure S1. RtrC binds DNA *in vitro*.** **A)** Electrophoretic mobility shift assay (EMSA) using purified

843 RtrC. Increasing concentrations of purified RtrC (0, 12.5, 25, 50, 75, 100, 150, and 300 nM) were

844 incubated with 6.25 nM labeled *hfiA* probe. Blot is representative of three biological replicates. **B)**

845 RtrC DNA binding curve derived from triplicate EMSA data.  $k_d$  was calculated based on

846 assumption of one site specific binding.

847

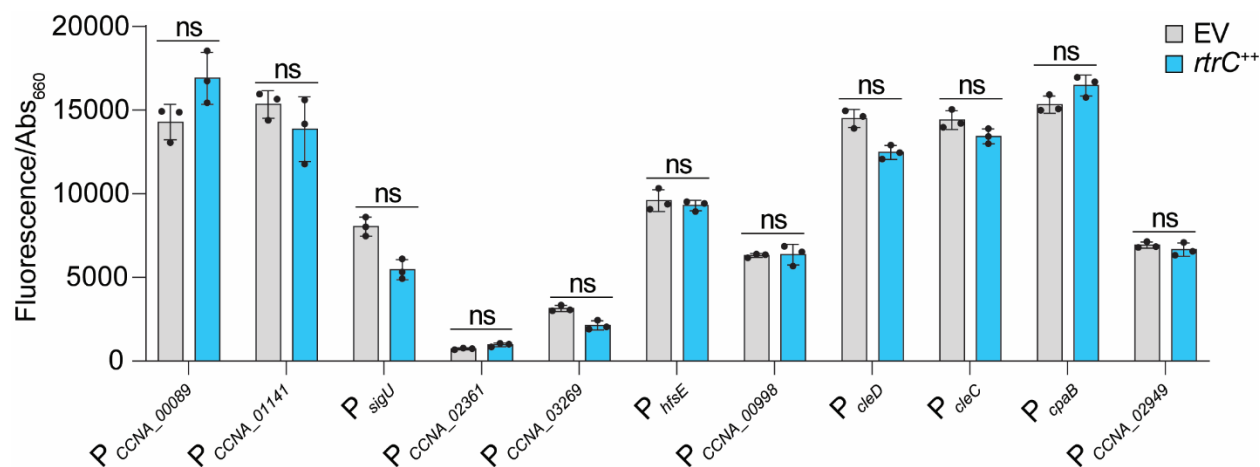

848

849 **Figure S2. Genes that contain an RtrC motif in their promoters but that are not differentially**

850 **regulated by *rtrC* overexpression.** There are several genes that are not regulated by *rtrC*

851 overexpression in the RNA-seq dataset (Table S2) despite the presence of an RtrC binding site

852 in their promoter. To confirm this result, transcription from these genes was measured using P<sub>gene-</sub>

853 *mNeonGreen* transcriptional fusion reporters in a strain overexpressing *rtrC* (*rtrC*<sup>++</sup>).

854 Fluorescence was normalized to cell density (OD<sub>660</sub>). Data show the mean; error bars represent

855 standard deviation of three biological replicates. Statistical significance was determined by

856 multiple unpaired t tests, correcting for multiple comparisons using the Holm-Šidák method (ns –

857 not significant).

858

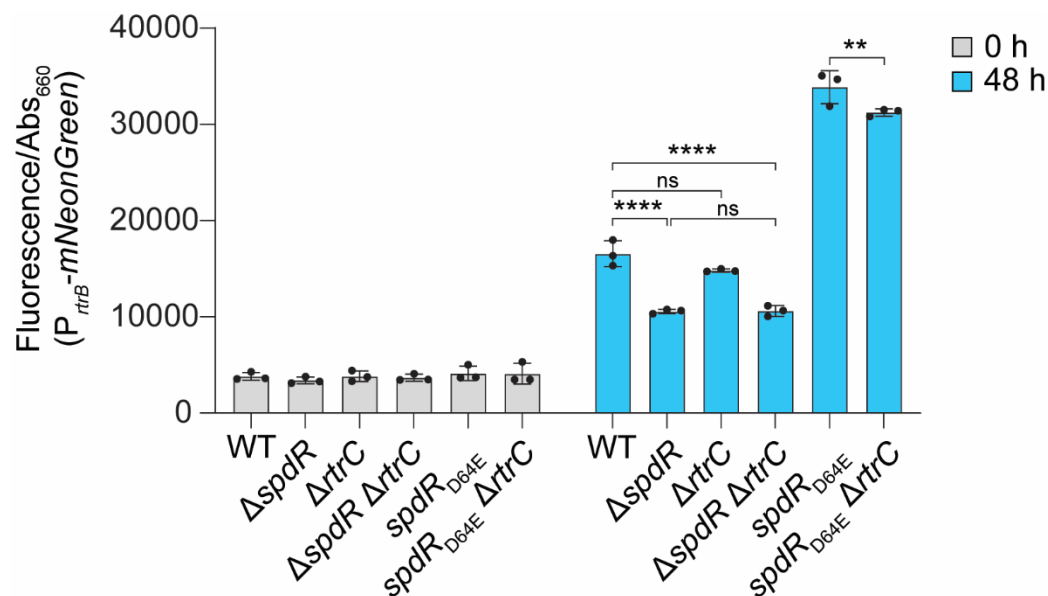

859

860 **Figure S3. *rtrB* expression in logarithmic versus stationary phase.** *rtrB* transcription can be

861 activated by both SpdR and RtrC (see Figure 6). *rtrB* transcription was measured using a P<sub>rtrB</sub>-

862 *mNeonGreen* transcriptional fusion reporter in a wild type (WT) or *spdR*<sub>D64E</sub> background with in-

863 frame deletions (Δ) in *spdR* and/or *rtrC* in early logarithmic phase cultures (0 h) and in stationary

864 phase (48 h). Fluorescence measurements were normalized to cell density (OD<sub>660</sub>). Data are the

865 mean; errors bars represent standard deviation of three biological replicates. Statistical

866 significance was determined by Two-way ANOVA followed by Tukey's multiple comparisons

867 within each time point (p-value ≤ 0.01, \*\*; p-value ≤ 0.0001, \*\*\*\*; ns – not significant).

868



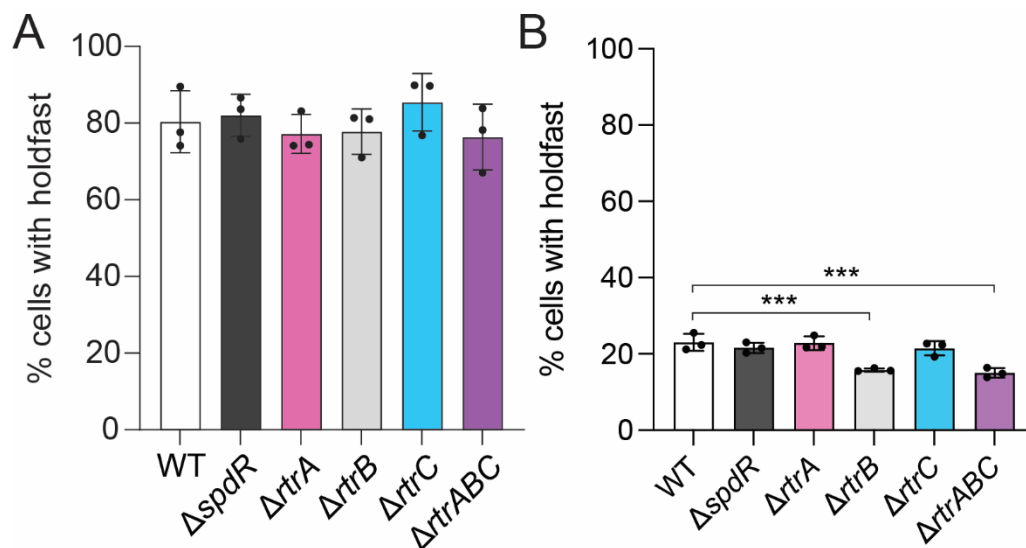

869

870 **Figure S4. Regulation of holdfast synthesis in complex media as a function of growth**

871 **phase. A-B)** Percentage of cells with stained holdfast in wild type (WT) and in strains bearing in-

872 frame deletions ( $\Delta$ ) in *spdR*, *rtrA*, *rtrB*, and *rtrC*. Holdfast counts were performed on cultures grown

873 in complex medium (PYE) in **A)** early log phase or **B)** stationary phase (after 24 hours of growth).

874 Data show the mean holdfast percentage; error bars are standard deviation of three biological

875 replicates. Statistical significance was determined by one-way ANOVA followed by Dunnett's

876 multiple comparison ( $p$ -value  $\leq 0.001$ , \*\*\*).

877

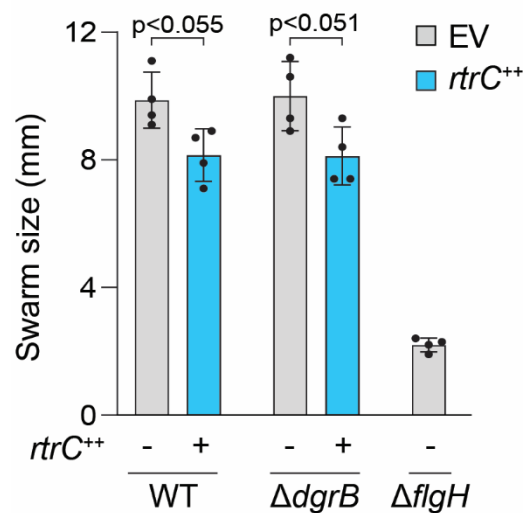

878

879 **Figure S5. *rtrC* overexpression reduces motility in soft agar.** Motility of strains overexpressing  
880 *rtrC* in soft agar. Wild type (WT) and strains bearing in-frame deletions ( $\Delta$ ) of *dgrB* and *flgH* are  
881 shown.  $\Delta flgH$  does not assemble a flagellum and is shown as a zero motility control. *rtrC<sup>++</sup>* is  
882 expressed from pPTM059 (shown in blue); pPTM059 alone is the empty vector control (EV). Swim  
883 diameter was measured after 3 days of incubation. Expression of *rtrC* was induced from a cumate-  
884 regulated promoter with 50  $\mu$ M cumate. Data presented are means and associated standard  
885 deviations from four biological replicates. Statistical analysis was multiple unpaired t tests,  
886 correcting for multiple comparisons using the Holm-Šídák method; p-values are marked above  
887 the bars that were compared.

888
